# Supplementary material
Source: PubMed Central journal article supplement (PMC2668058)
Supplement: mmc1.pdf [file mmc1.pdf]

## **Supplemental Data**

### **The Genome-wide Patterns of Variation**

#### **Expose Significant Substructure**

#### **in a Founder Population**

**Eveliina Jakkula, Karola Rehnström, Teppo Varilo, Olli P. H. Pietiläinen, Tiina Paunio, Nancy L. Pedersen,<sup>5</sup> Ulf deFaire, Marjo-Riitta Järvelin, Juha Saharinen, Nelson Freimer, Samuli Ripatti, Shaun Purcell, Andrew Collins, Mark J Daly, Aarno Palotie, and Leena Peltonen**

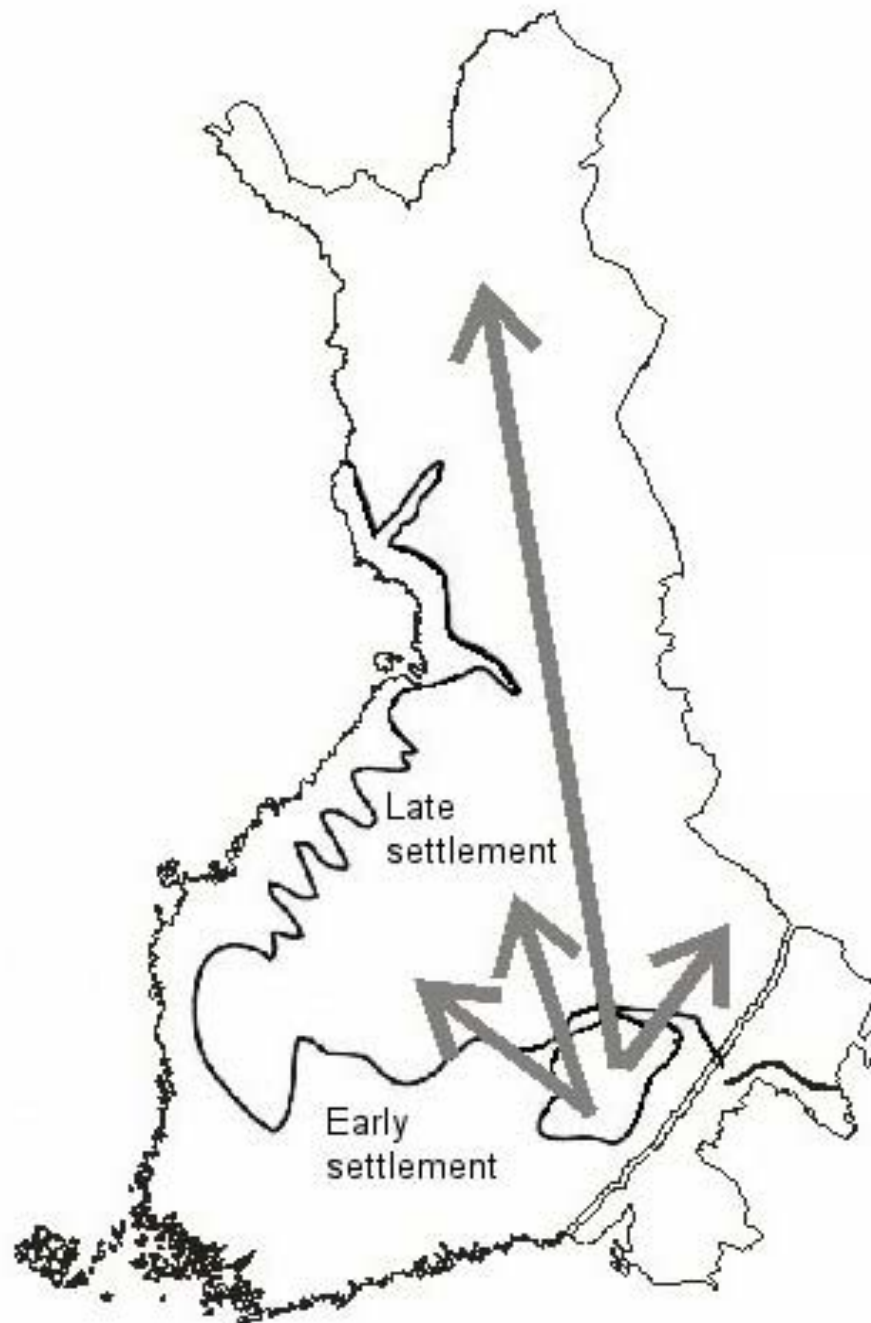

**Figure S1. Division of Finland into early and late settlement.**

The South Savo region is marked and arrows indicate the internal migration from South Savo to the rest of Finland.

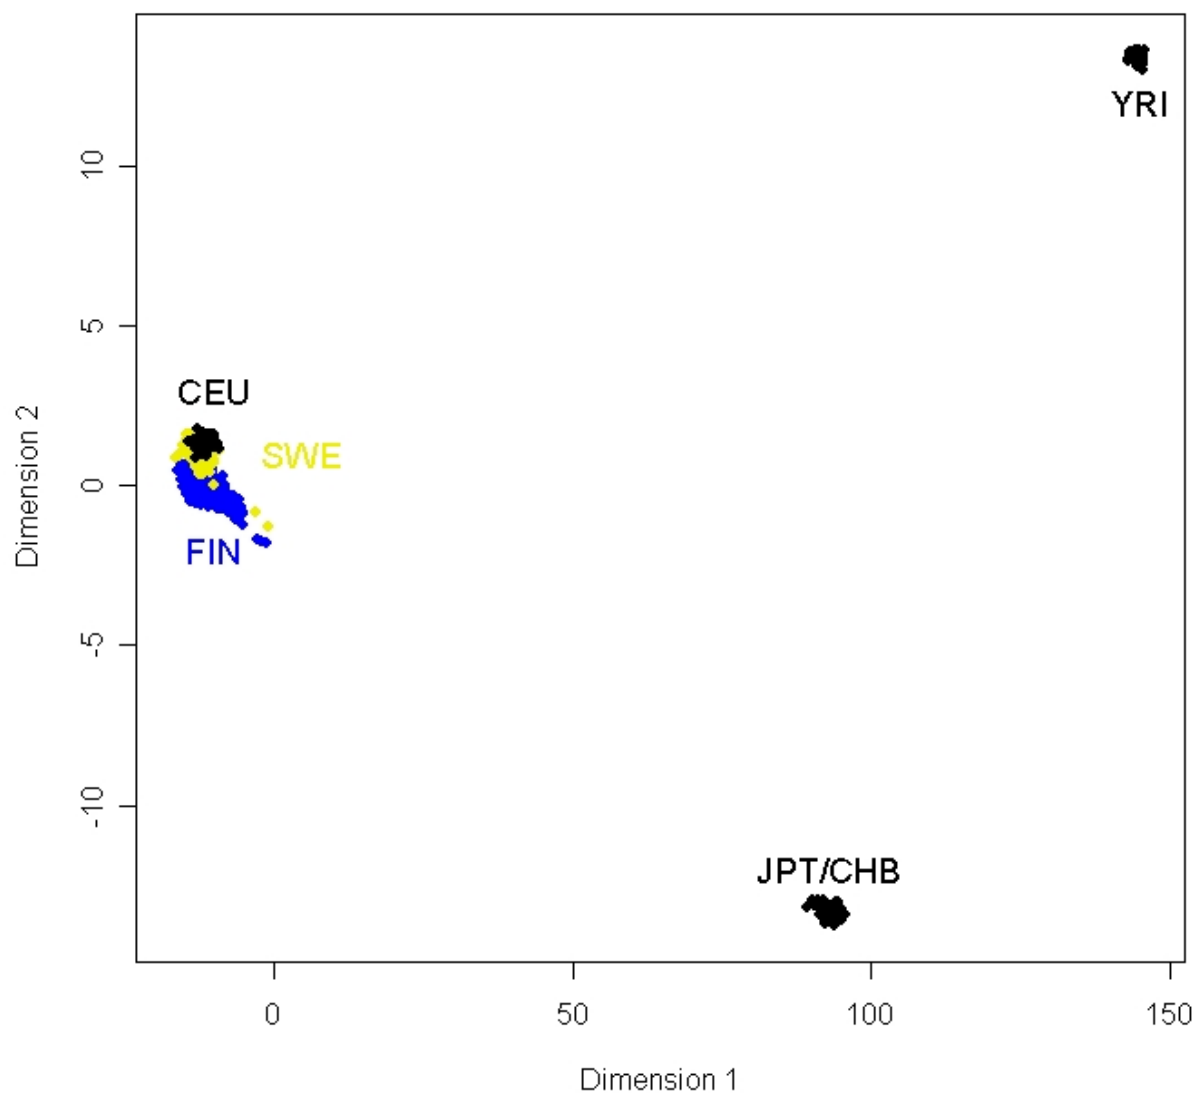

**Figure S2. The first two dimensions of variation in the Finnish and Swedish populations compared to the three HapMap populations.**

All Finnish samples, including the subpopulations as well as the Helsinki (HEL) samples have been grouped together to form the FIN population. CEU – CEPH individuals of European Ancestry, CHB – Han Chinese, FIN –Finland, JPT – Japanese, SWE – Sweden, YRI – Yoruba.

A

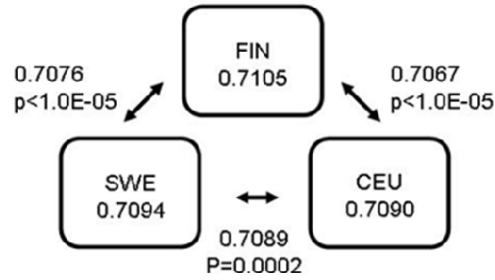

B

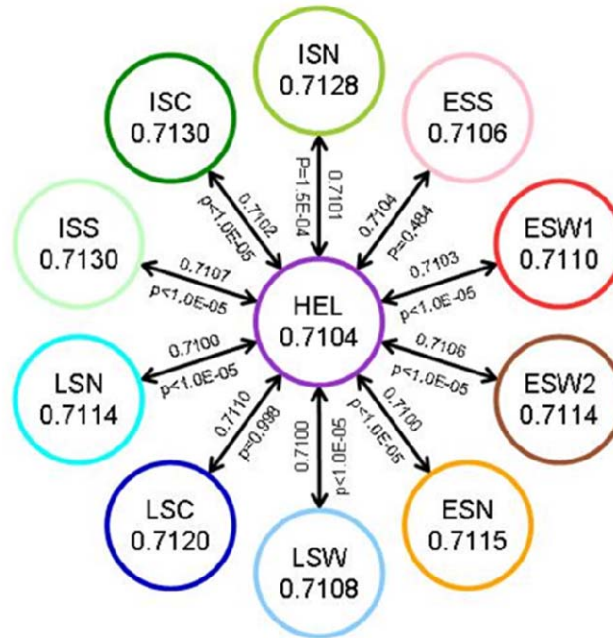

**Figure S3. The average genome-wide IBS pairwise identities within and between groups.**

Note that absolute values of the IBS sharing are not informative, but the values are only meaningful in relation to each other (A) IBS-sharing within and between the Finnish, Swedish and CEU groups. (B) IBS-sharing within all Finnish subgroups and between all subgroups and the Helsinki (HEL) population, also the p-value for the difference between groups are indicated (p-values also indicated in table 1). CEU – HapMap CEPH, SWE – Sweden, HEL – Helsinki, ESS – Early Settlement South, ESW1 – Early Settlement West 1 (South Oulu), ESW2 – Early Settlement West 2 (North Oulu), ESN – Early Settlement North (West Lapland), LSW – Late Settlement West (South Ostrobothnia), LSC – Late Settlement Central (Central Finland), LSN – Late Settlement North (Central Lapland), ISS – Isolate South (South Kainuu), ISC – Isolate Central (North Kainuu), ISN – Isolate North (East Lapland).

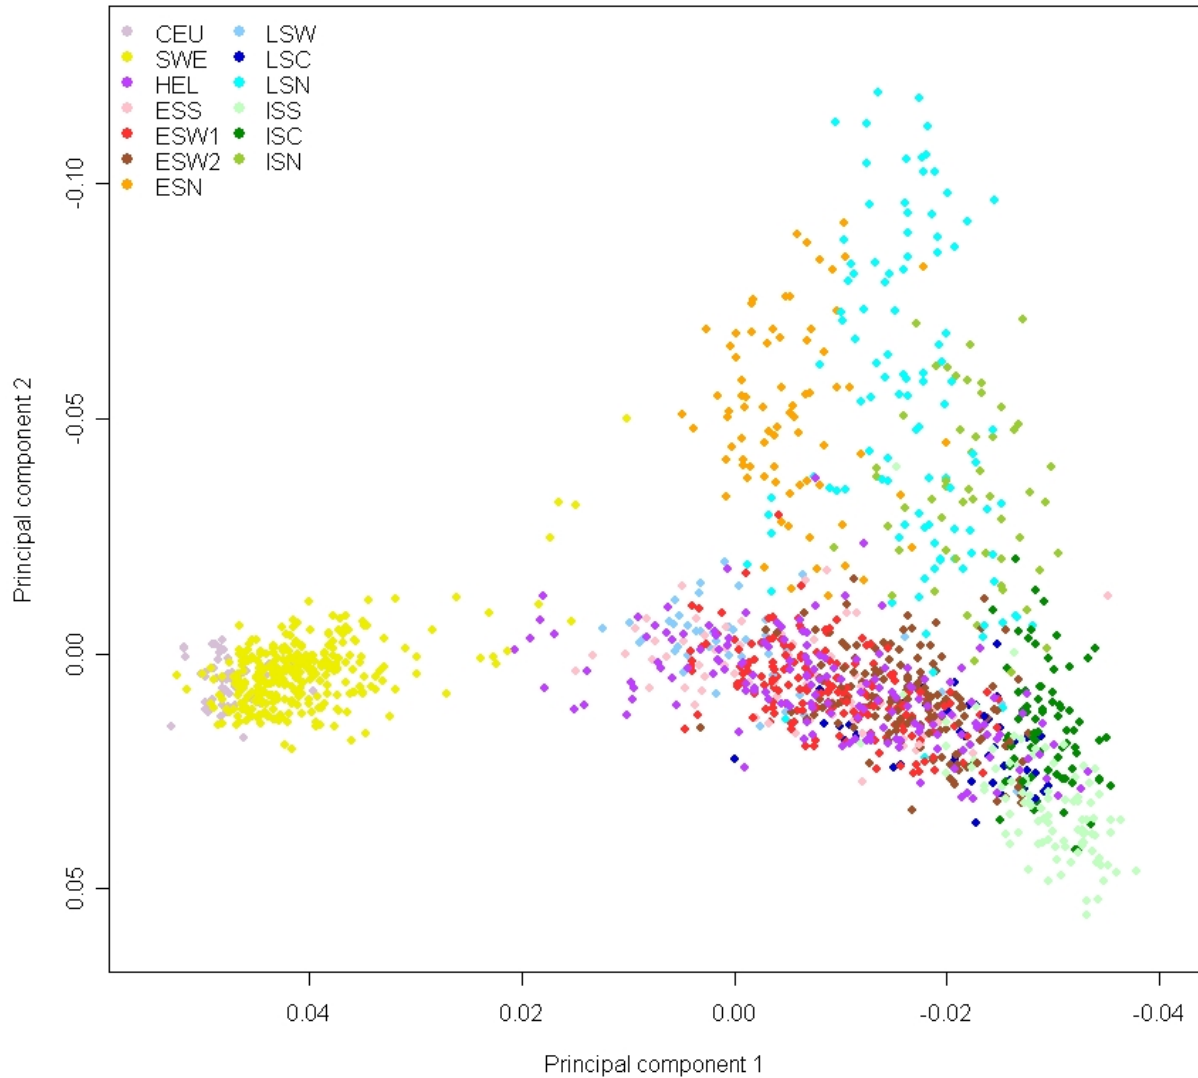

**Figure S4. Substructure analysis using the first two eigenvectors from Eigensoft analysis.**

CEU – HapMap CEPH, SWE – Sweden, HEL – Helsinki, ESS – Early Settlement South, ESW1 – Early Settlement West 1 (South Oulu), ESW2 – Early Settlement West 2 (North Oulu), ESN – Early Settlement North (West Lapland), LSW – Late Settlement West (South Ostrobothnia), LSC – Late Settlement Central (Central Finland), LSN – Late Settlement North (Central Lapland), ISS – Isolate South (South Kainuu), ISC – Isolate Central (North Kainuu), ISN – Isolate North (East Lapland).

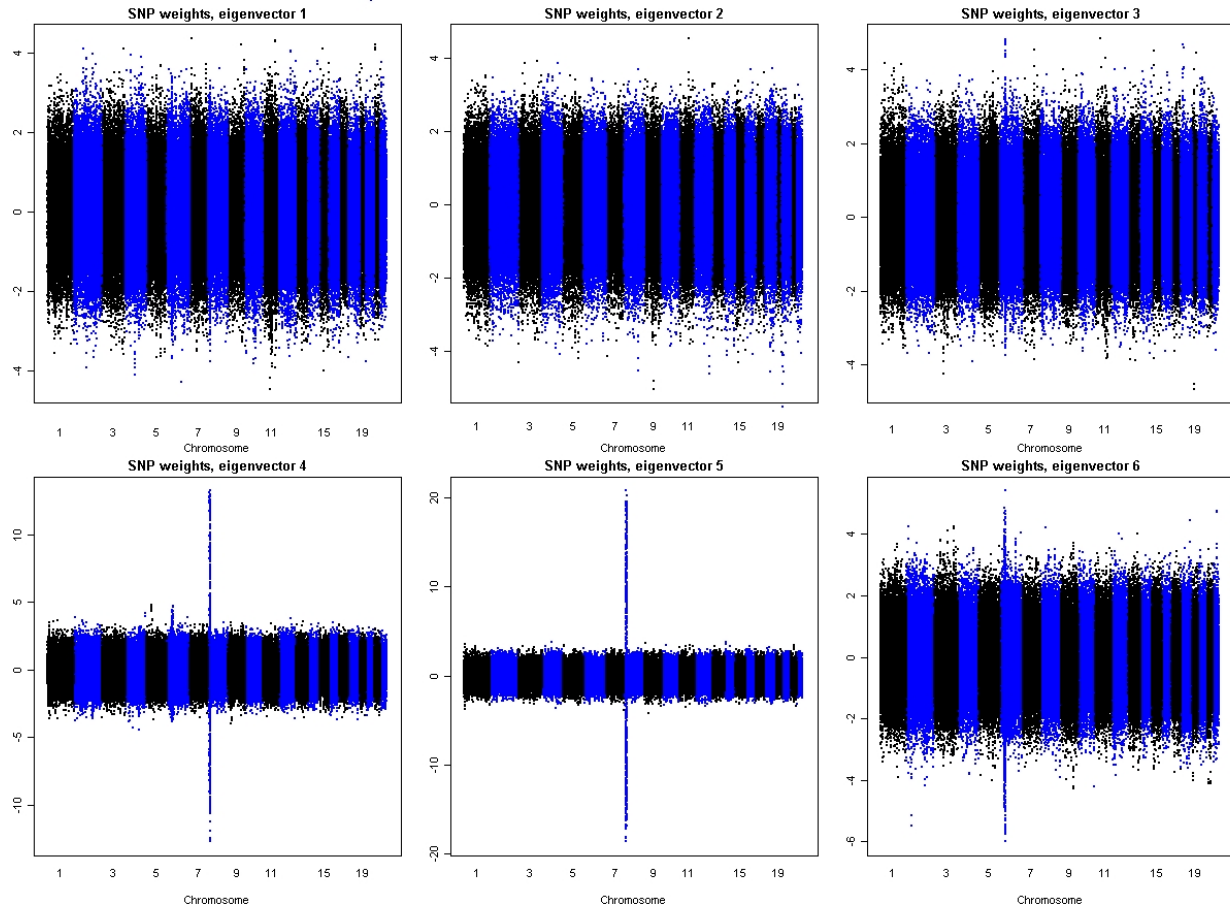

**Figure S5. SNP weights for all autosomal SNPs.**

Weights were estimated from principal component analysis using Eigensoft for the first six eigenvectors for all samples including all Finns, Swedes and HapMap CEU. The region showing high significance in eigenvectors 4 and 5 is located at the 8p23 inversion.

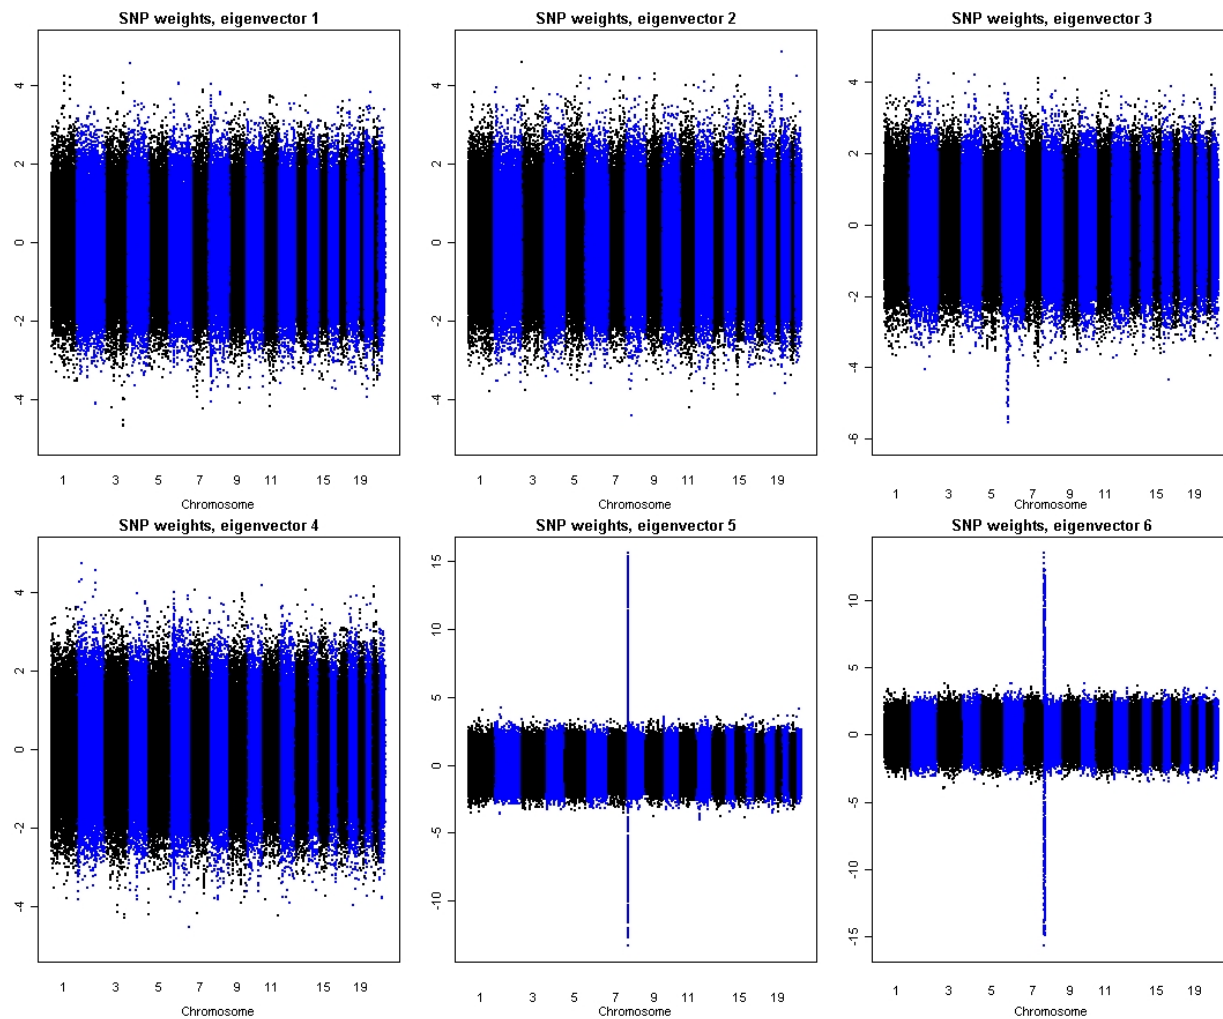

**Figure S6. SNP weights for all autosomal SNPs.**

Weights were estimated from principal component analysis using Eigensoft for the first six eigenvectors for all samples including only the Finnish samples. The region showing high significance in eigenvectors 5 and 6 is located at the 8p23 inversion.

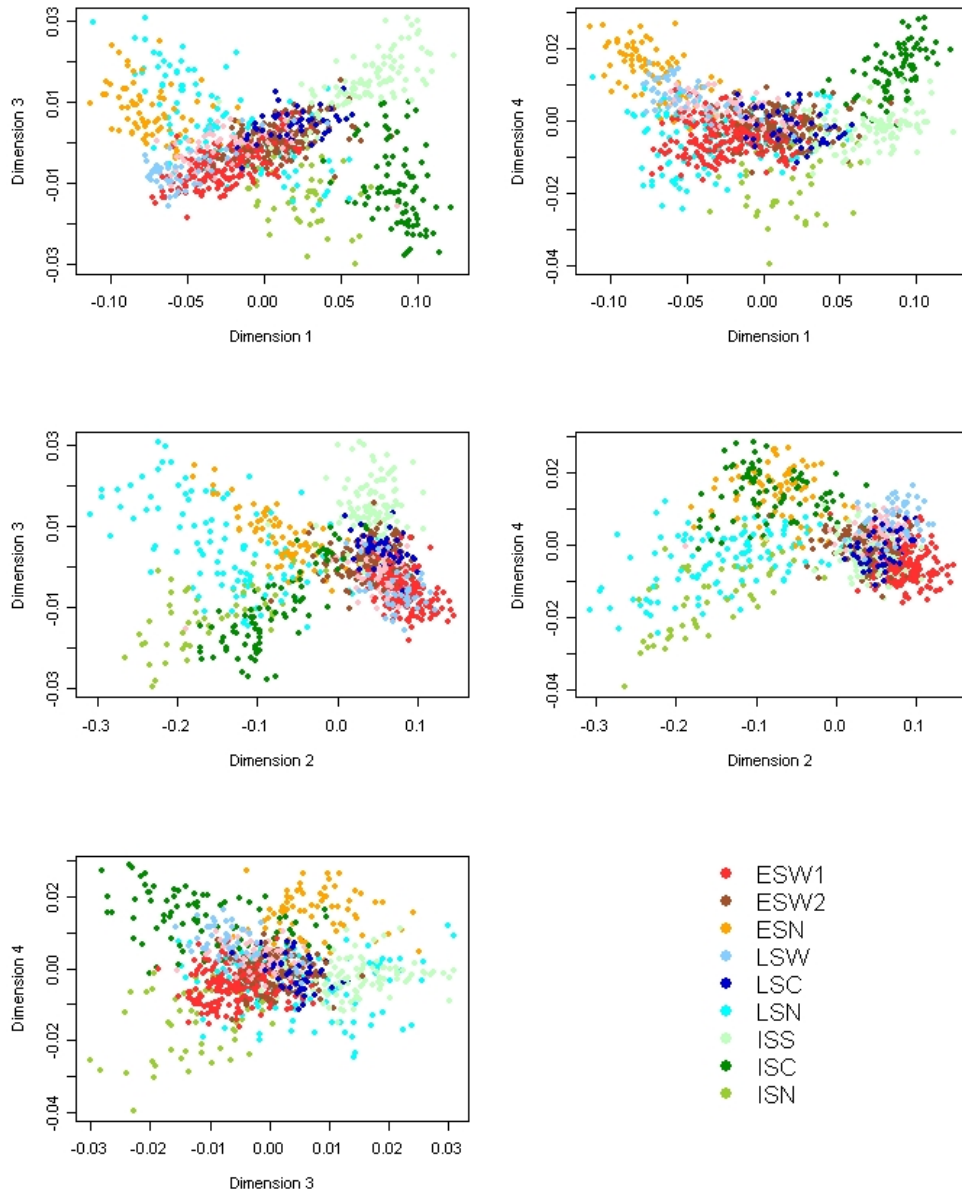

**Figure S7. Visualization of the third and fourth dimensions of the multidimensional scaling (MDS) analysis.**

ESW1 – Early Settlement West 1 (South Oulu), ESW2 – Early Settlement West 2 (North Oulu), ESN – Early Settlement North (West Lapland), LSW – Late Settlement West (South Ostrobothnia), LSC – Late Settlement Central (Central Finland), LSN – Late Settlement North (Central Lapland), ISS – Isolate South (South Kainuu), ISC – Isolate Central (North Kainuu), ISN – Isolate North (East Lapland).



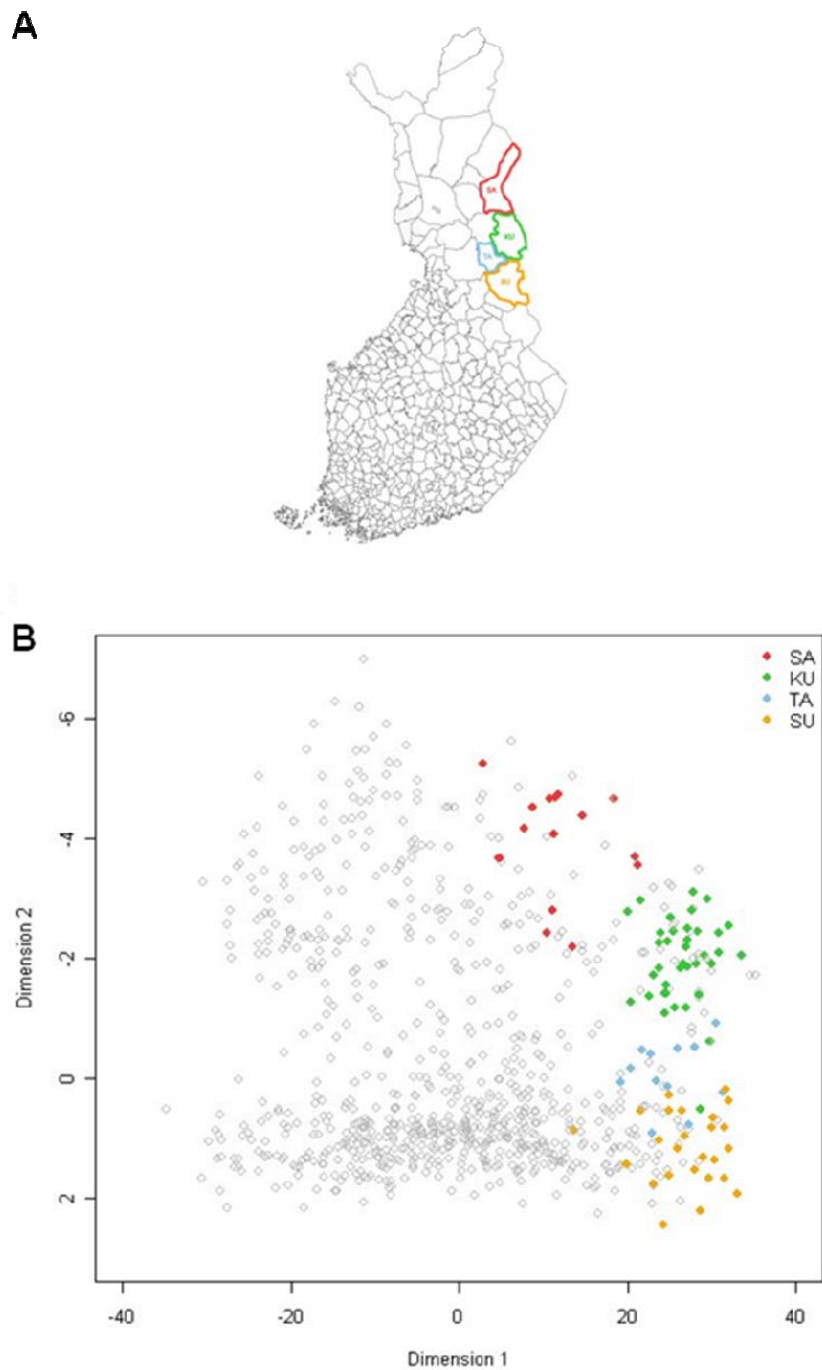

**Figure S8. Results of MDS analysis of the IBS-sharing matrix in the youngest subisolates in northeastern Finland.**

Individuals with both parents from four municipalities show clustering and separation on a north-south gradient. SA – Salla, KU – Kuusamo, TA – Taivalkoski, SU – Suomussalmi

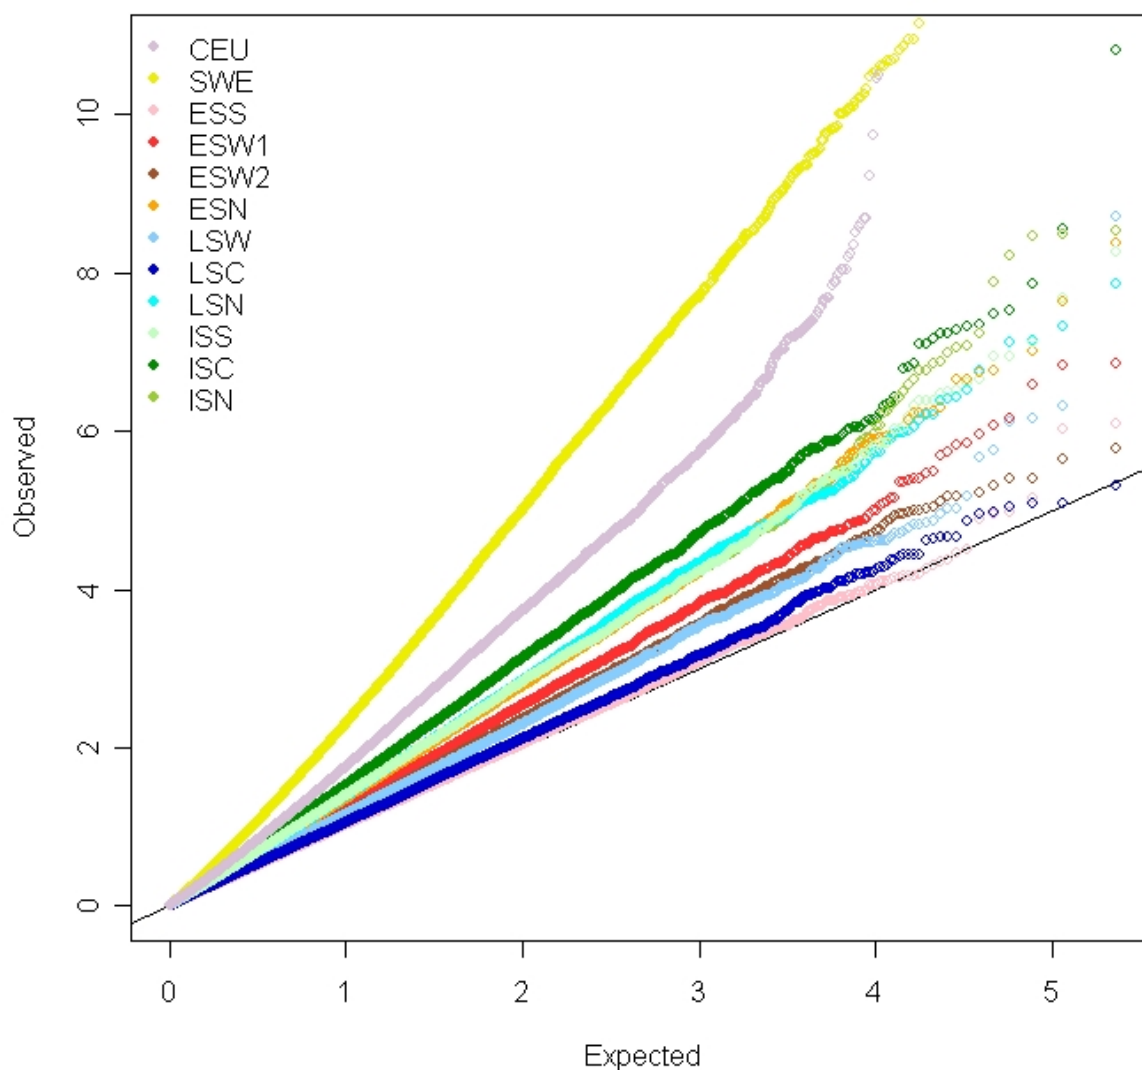

**Figure S9. Quantile-quantile plots of uncorrected p-values of association tests for each subisolate, Swedes and CEU versus the Helsinki population.**

The most extreme p-values for CEU and SWE have been omitted. CEU – HapMap CEPH, SWE – Sweden, HEL – Helsinki, ESS – Early Settlement South, ESW1 – Early Settlement West 1 (South Oulu), ESW2 – Early Settlement West 2 (North Oulu), ESN – Early Settlement North (West Lapland), LSW – Late Settlement West (South Ostrobothnia), LSC – Late Settlement Central (Central Finland), LSN – Late Settlement North (Central Lapland), ISS – Isolate South (South Kainuu), ISC – Isolate Central (North Kainuu), ISN – Isolate North (East Lapland).

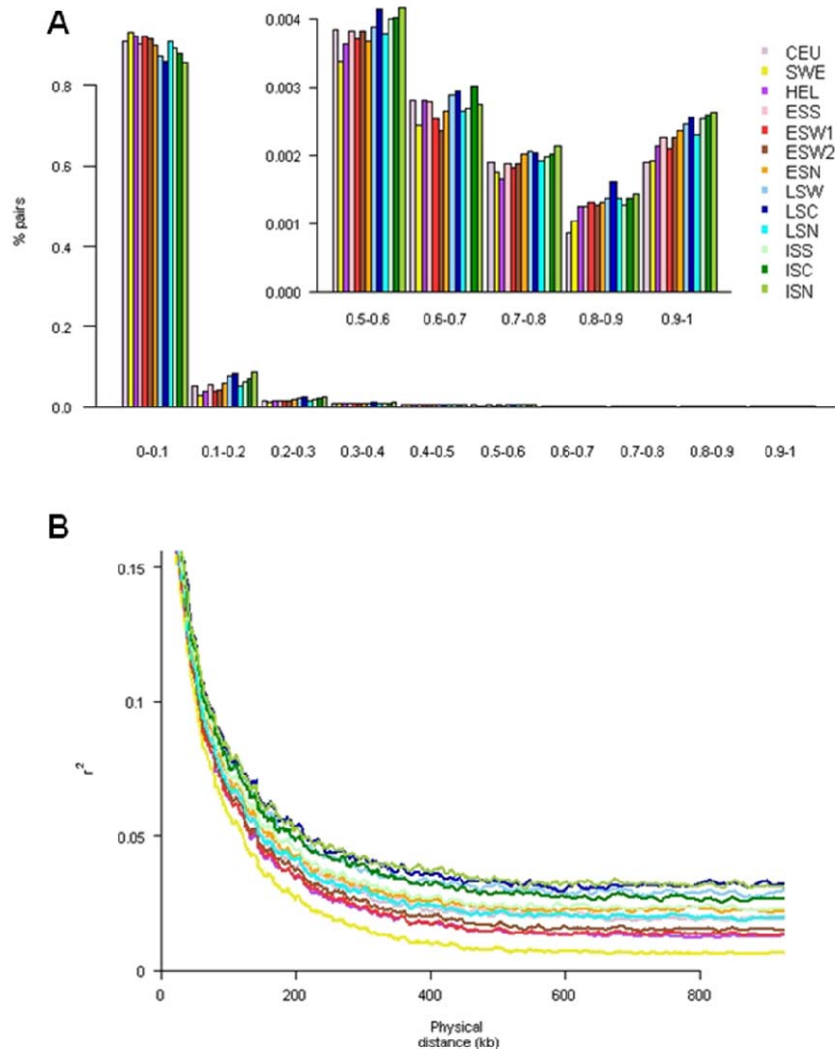

**Figure S10. Distribution of correlation ( $r^2$ ) between pairs of SNPs on chromosome 3q.**

(A) Distribution of  $r^2$  for SNP pairs. The inset shows an enhanced view of the high-LD bins for the different populations. (B) Correlation between physical distance and correlation between pairs of SNPs.  $r^2$  was estimated in successive windows of 5000 SNP-SNP pairs (4000 SNP pair overlap). CEU – HapMap CEPH, SWE – Sweden, HEL – Helsinki, ESS – Early Settlement South, ESW1 – Early Settlement West 1 (South Oulu), ESW2 – Early Settlement West 2 (North Oulu), ESN – Early Settlement North (West Lapland), LSW – Late Settlement West (South Ostrobothnia), LSC – Late Settlement Central (Central Finland), LSN – Late Settlement North (Central Lapland), ISS – Isolate South (South Kainuu), ISC – Isolate Central (North Kainuu), ISN – Isolate North (East Lapland).

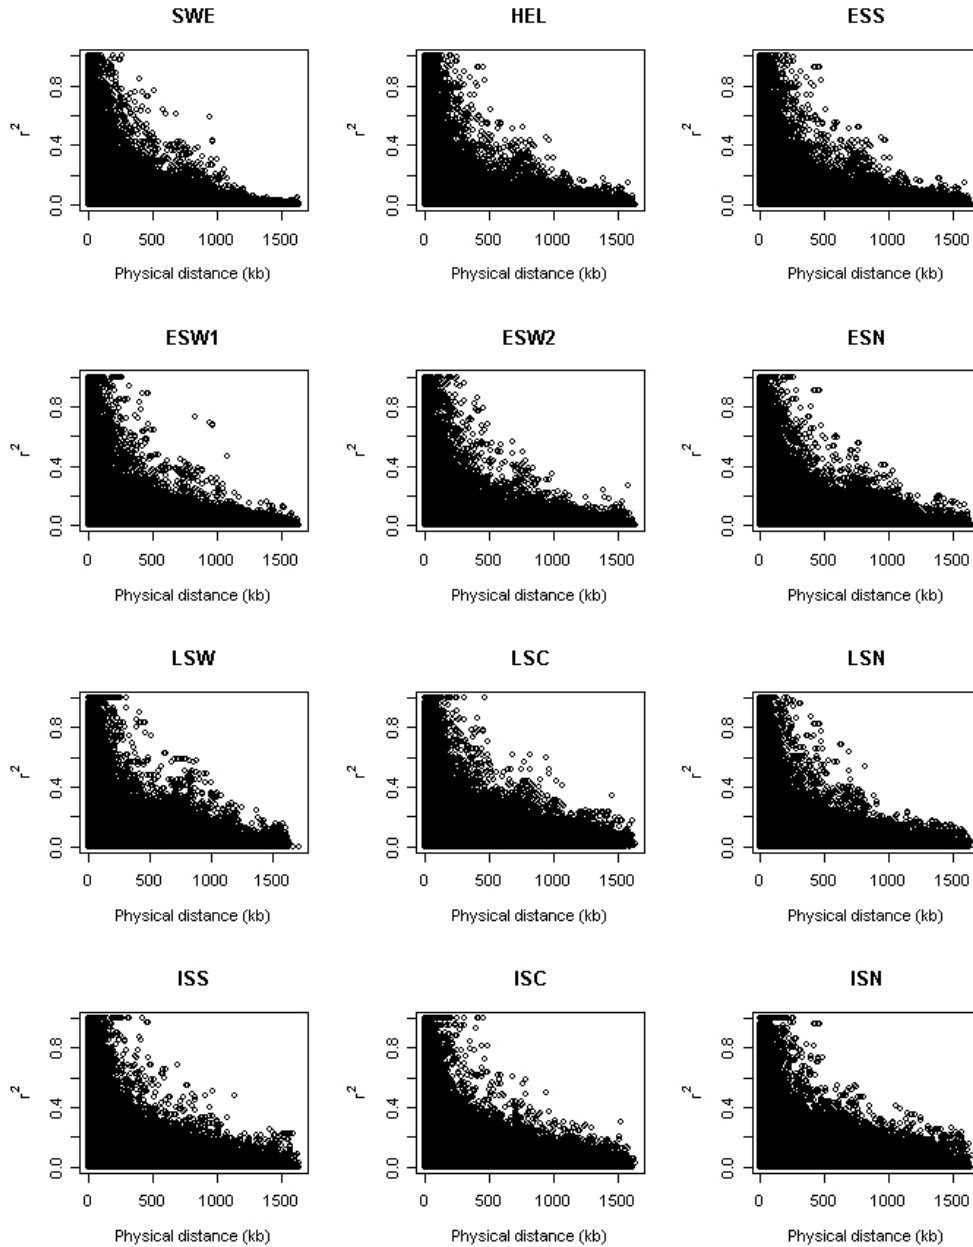

**Figure S11. Distribution of LD measured in  $r^2$  versus distance in the different populations on chromosome 22.**

SWE – Sweden, HEL – Helsinki, ESS – Early Settlement South, ESW1 – Early Settlement West 1 (South Oulu), ESW2 – Early Settlement West 2 (North Oulu), ESN – Early Settlement North (West Lapland), LSW – Late Settlement West (South Ostrobothnia), LSC – Late Settlement Central (Central Finland), LSN – Late Settlement North (Central Lapland), ISS – Isolate South (South Kainuu), ISC – Isolate Central (North Kainuu), ISN – Isolate North (East Lapland).

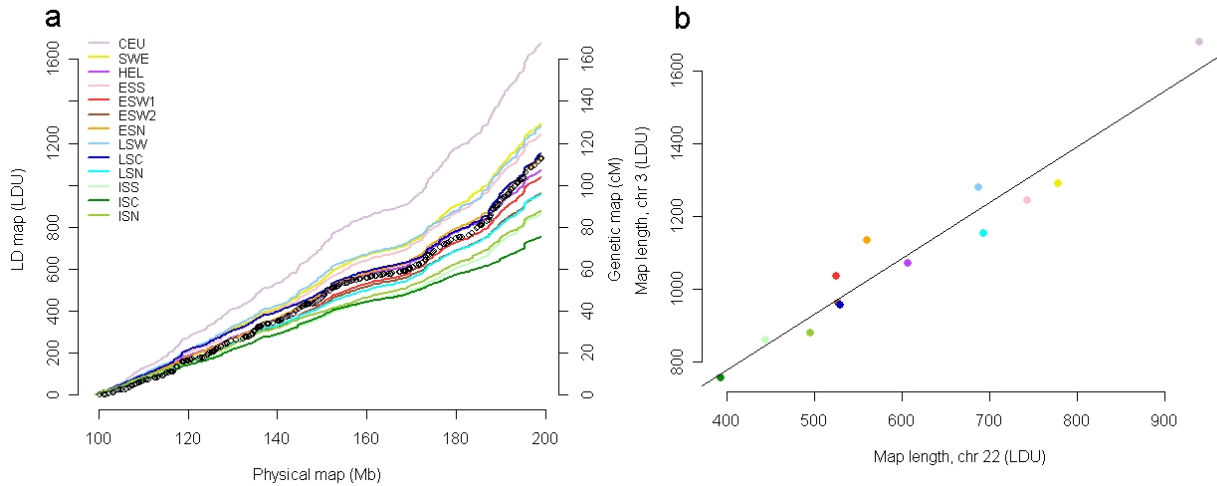

**Figure S12. LD-maps for the long arm of chromosome 3.**

(a) The length of LD-maps for chromosome 3q. Open circles indicate the genetic map. (b) Correlation between map lengths of chromosome 22 and chromosome 3. The map lengths show high correlation (Adjusted  $r^2=0.94$ ). CEU – HapMap CEPH, SWE – Sweden, HEL – Helsinki, ESS – Early Settlement South, ESW1 – Early Settlement West 1 (South Oulu), ESW2 – Early Settlement West 2 (North Oulu), ESN – Early Settlement North (West Lapland), LSW – Late Settlement West (South Ostrobothnia), LSC – Late Settlement Central (Central Finland), LSN – Late Settlement North (Central Lapland), ISS – Isolate South (South Kainuu), ISC – Isolate Central (North Kainuu), ISN – Isolate North (East Lapland).

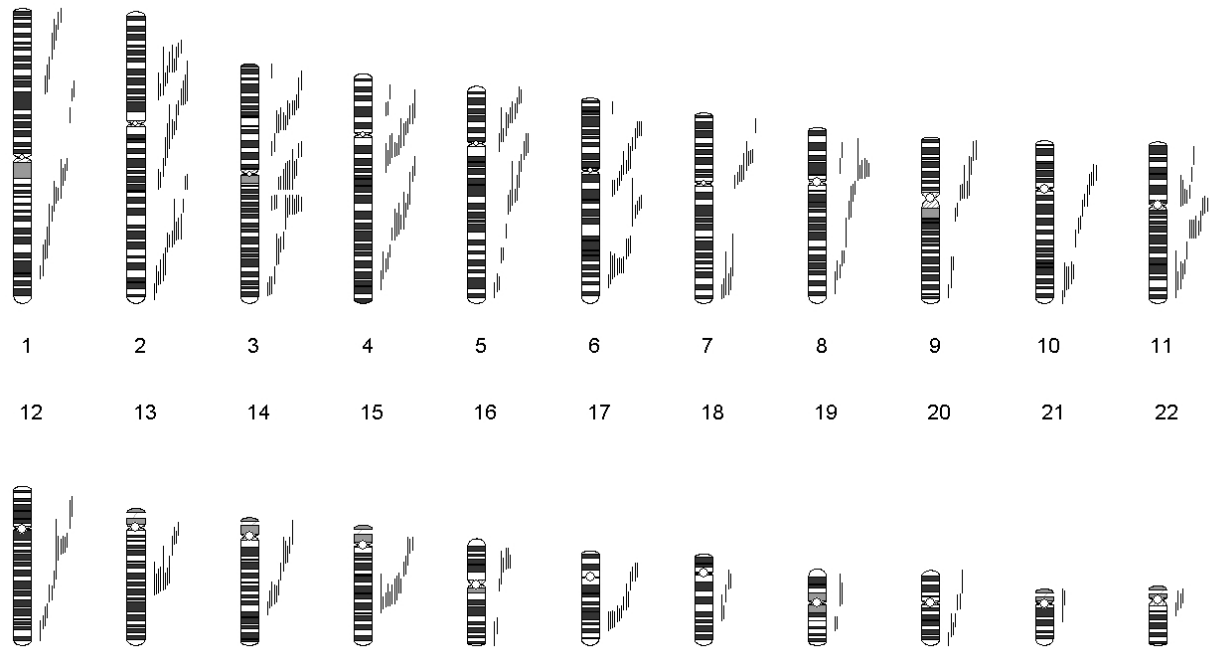

**Figure S13. Chromosomal distribution of homozygous stretches >10Mb.**

Homozygous stretches were determined for all Finns, including all subisolates as well as the Helsinki population.

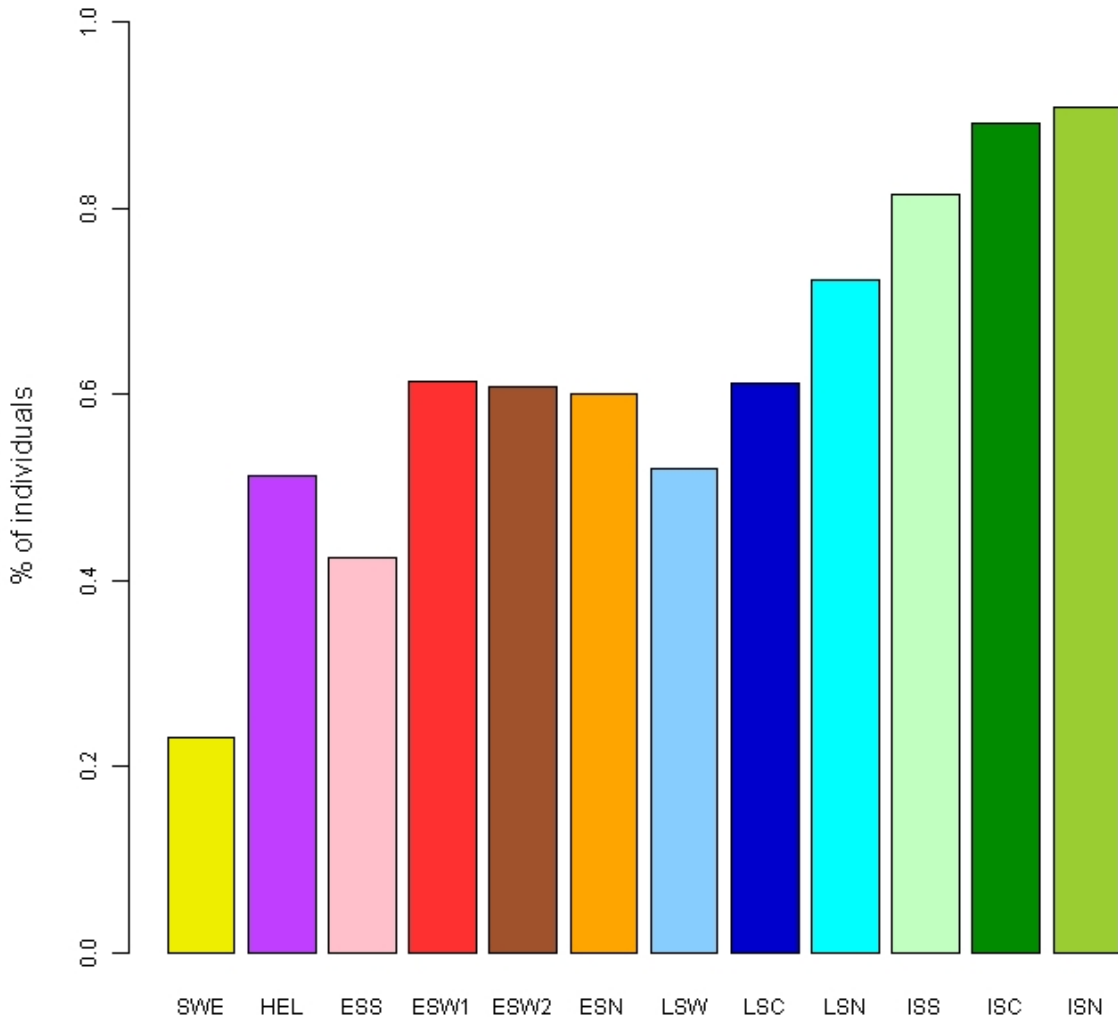

**Figure S14. Percentage of individuals within the subpopulations who have at least one homozygous stretch >5Mb.**

SWE – Sweden, HEL – Helsinki, ESS – Early Settlement South, ESW1 – Early Settlement West 1 (South Oulu), ESW2 – Early Settlement West 2 (North Oulu), ESN – Early Settlement North (West Lapland), LSW – Late Settlement West (South Ostrobothnia), LSC – Late Settlement Central (Central Finland), LSN – Late Settlement North (Central Lapland), ISS – Isolate South (South Kainuu), ISC – Isolate Central (North Kainuu), ISN – Isolate North (East Lapland).

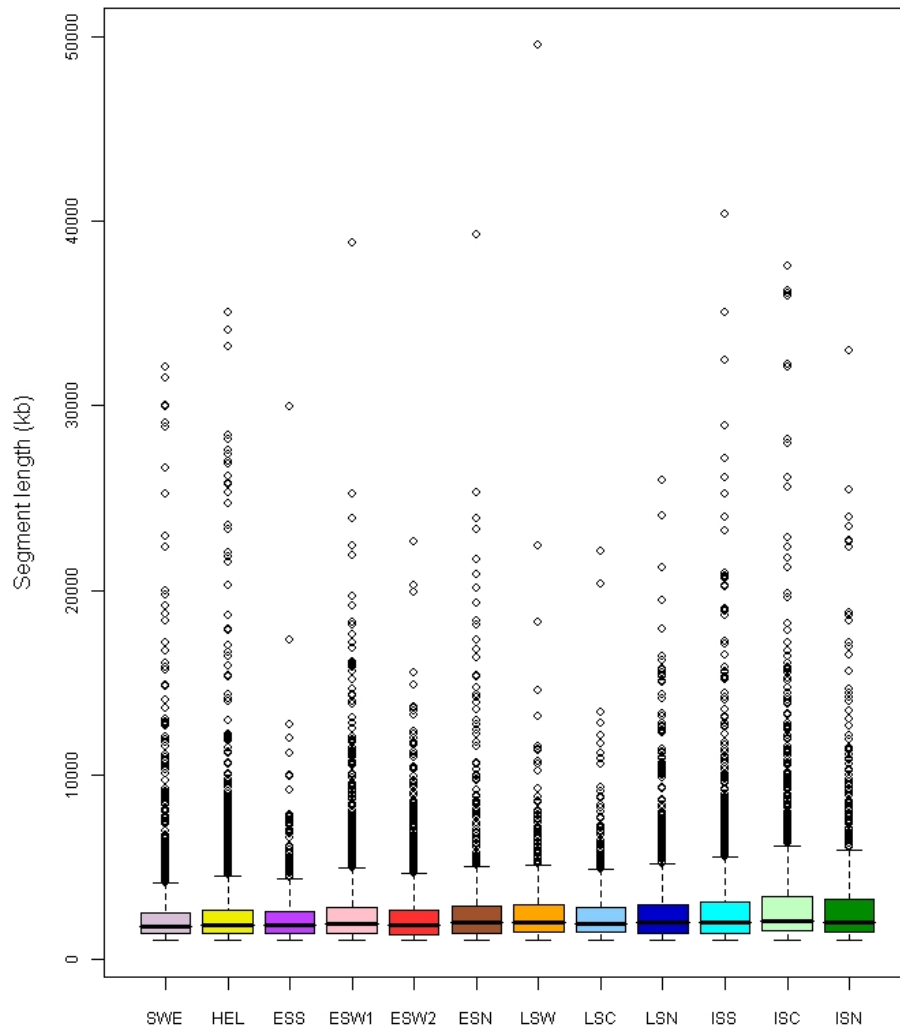

**Figure S15. Distribution of the length of homozygous segments within the different subpopulations.**

Equal to figure 4b, however the outliers have been included. SWE – Sweden, HEL – Helsinki, ESS – Early Settlement South, ESW1 – Early Settlement West 1 (South Oulu), ESW2 – Early Settlement West 2 (North Oulu), ESN – Early Settlement North (West Lapland), LSW – Late Settlement West (South Ostrobothnia), LSC – Late Settlement Central (Central Finland), LSN – Late Settlement North (Central Lapland), ISS – Isolate South (South Kainuu), ISC – Isolate Central (North Kainuu), ISN – Isolate North (East Lapland).



**Table S1. Summary of population groups used in the study including details of genotyping and QC procedures.**

| Group | n of individuals | n of individuals after QC | Females / males | % females | Chip type            | Average genotyping rate per indiv | n of SNPs with HWE $p < 0.001$ |
|-------|------------------|---------------------------|-----------------|-----------|----------------------|-----------------------------------|--------------------------------|
| SWE   | 302              | 302                       | 302/0           | 100       | 318K duo             | 0.998                             | 0                              |
| HEL   | 162              | 162                       | 91/71           | 56        | 370K                 | 0.999                             | 166                            |
| ESS   | 73               | 73                        | 30/43           | 41        | 318K duo, 370K       | 0.999                             | 126                            |
| ESW1  | 184              | 179                       | 94/85           | 53        | 370K, 318K duo       | 0.998                             | 152                            |
| ESW2  | 153              | 145                       | 81/64           | 65        | 370K, 318K duo       | 0.998                             | 163                            |
| ESN   | 80               | 76                        | 35/41           | 46        | 370K                 | 0.998                             | 115                            |
| LSW   | 48               | 48                        | 24/24           | 50        | 317K, 318K duo, 370K | 0.997                             | 115                            |
| LSC   | 47               | 46                        | 24/22           | 52        | 317K, 370K           | 0.998                             | 69                             |
| LSN   | 111              | 107                       | 51/56           | 48        | 370K                 | 0.998                             | 119                            |
| ISS   | 97               | 96                        | 44/52           | 46        | 318K duo, 370K       | 0.998                             | 135                            |
| ISC   | 83               | 78                        | 35/43           | 45        | 318K duo, 370K       | 0.998                             | 138                            |
| ISN   | 55               | 53                        | 30/23           | 57        | 370K                 | 0.998                             | 94                             |

SWE – Sweden, HEL – Helsinki, ESS – Early Settlement South, ESW1 – Early Settlement West 1 (South Oulu), ESW2 – Early Settlement West 2 (North Oulu), ESN – Early Settlement North (West Lapland), LSW – Late Settlement West (South Ostrobothnia), LSC – Late Settlement Central (Central Finland), LSN – Late Settlement North (Central Lapland), ISS – Isolate South (South Kainuu), ISC – Isolate Central (North Kainuu), ISN – Isolate North (East Lapland), QC – Quality control, 317K – Illumina HumanHap 300, 318K duo – Illumina HumanHap 300 duo, 370K – Illumina HumanCNV370-duo, HWE – Hardy Weinberg Equilibrium.

**Table S2. Eigenvalues and statistical significance of top ten principal components from Eigenstrat analysis.**

| Number | All populations |              |            |               | Finnish subpopulations |              |            |               |
|--------|-----------------|--------------|------------|---------------|------------------------|--------------|------------|---------------|
|        | Eigenvalue      | TW statistic | TW p-value | ANOVA p-value | Eigenvalue             | TW statistic | TW p-value | ANOVA p-value |
| 1      | 7.79            | 2120.32      | 0          | 0             | 2.813116               | 586.12       | 0          | 3.59E-17      |
| 2      | 2.46            | 506.64       | 0          | 0             | 2.3897                 | 437.30       | 0          | 5.10E-17      |
| 3      | 2.21            | 395.93       | 0          | 3.32E-17      | 1.862958               | 215.45       | 0          | 9.00E-18      |
| 4      | 1.80            | 197.60       | 0          | 1.68E-16      | 1.693716               | 141.89       | 0          | 0             |
| 5      | 1.78            | 190.12       | 0          | 0             | 1.636356               | 117.74       | 0          | 8.28E-17      |
| 6      | 1.68            | 141.38       | 0          | 0             | 1.622584               | 113.37       | 0          | 1.48E-16      |
| 7      | 1.65            | 124.53       | 0          | 0             | 1.550314               | 81.20        | 6.39E-214  | 1.04E-16      |
| 8      | 1.61            | 107.77       | 0          | 5.88E-11      | 1.509571               | 63.29        | 8.55E-148  | 4.01E-17      |
| 9      | 1.56            | 82.31        | 2.91E-218  | 1.41E-16      | 1.485165               | 52.82        | 3.73E-113  | 1.14E-13      |
| 10     | 1.52            | 61.69        | 2.65E-142  | 1.37E-16      | 1.468755               | 46.00        | 2.47E-92   | 3.05E-16      |

All values are reported for two sets, “all populations” which includes all Finns as well as Swedes and HapMap CEU, and “Finnish subpopulations” which includes the Finnish subpopulations without Swedes or CEU. TW – Tracy-Widom statistics.

**Table S3. P-values for test of population differentiation using Eigensoft.**

|      | HEL       | ESS       | ESW1      | ESW2      | ESN       | LSW       | LSN       | LSC       | ISS       | ISC       | ISN       |
|------|-----------|-----------|-----------|-----------|-----------|-----------|-----------|-----------|-----------|-----------|-----------|
| HEL  |           | 0.031     | 4.11E-142 | 5.23E-93  | 4.07E-197 | 3.75E-61  | 2.28E-123 | 3.95E-27  | 1.07E-168 | 5.43E-217 | 9.31E-195 |
| ESS  | 0.031     |           | 3.61E-103 | 3.17E-93  | 1.82E-133 | 3.61E-45  | 1.88E-83  | 5.31E-41  | 2.64E-149 | 9.07E-154 | 1.49E-132 |
| ESW1 | 4.11E-142 | 3.61E-103 |           | 3.84E-128 | 5.24E-273 | 2.24E-116 | 2.95E-151 | 6.76E-103 | 5.32E-257 | 1.83E-283 | 7.03E-225 |
| ESW2 | 5.23E-93  | 3.17E-93  | 3.84E-128 |           | 3.37E-213 | 8.66E-151 | 1.43E-89  | 3.24E-57  | 1.01E-133 | 1.01E-227 | 4.31E-159 |
| ESN  | 4.07E-197 | 1.82E-133 | 5.24E-273 | 3.37E-213 |           | 3.91E-121 | 2.55E-102 | 3.28E-126 | 8.58E-207 | 5.00E-161 | 1.71E-160 |
| LSW  | 3.75E-61  | 3.61E-45  | 2.24E-116 | 8.66E-151 | 3.91E-121 |           | 1.37E-101 | 1.33E-86  | 5.16E-133 | 2.53E-151 | 5.43E-131 |
| LSN  | 2.28E-123 | 1.88E-83  | 2.95E-151 | 1.43E-89  | 2.55E-102 | 1.37E-101 |           | 1.43E-57  | 2.39E-131 | 4.91E-147 | 8.08E-60  |
| LSC  | 3.95E-27  | 5.31E-41  | 6.76E-103 | 3.24E-57  | 3.28E-126 | 1.33E-86  | 1.43E-57  |           | 8.64E-76  | 1.00E-136 | 7.93E-104 |
| ISS  | 1.07E-168 | 2.64E-149 | 5.32E-257 | 1.01E-133 | 8.58E-207 | 5.16E-133 | 2.39E-131 | 8.64E-76  |           | 5.25E-173 | 1.15E-165 |
| ISC  | 5.43E-217 | 9.07E-154 | 1.83E-283 | 1.01E-227 | 5.00E-161 | 2.53E-151 | 4.91E-147 | 1.00E-136 | 5.25E-173 |           | 1.31E-146 |
| ISN  | 9.31E-195 | 1.49E-132 | 7.03E-225 | 4.31E-159 | 1.71E-160 | 5.43E-131 | 8.08E-60  | 7.93E-104 | 1.15E-165 | 1.31E-146 |           |

The test is a summary of Anova statistics across the first 10 eigenvectors, and corresponds approximately to a chi-square test with 10 degrees of freedom. HEL – Helsinki, ESS – Early Settlement South, ESW1 – Early Settlement West 1 (South Oulu), ESW2 – Early Settlement West 2 (North Oulu), ESN – Early Settlement North (West Lapland), LSW – Late Settlement West (South Ostrobothnia), LSC – Late Settlement Central (Central Finland), LSN – Late Settlement North (Central Lapland), ISS – Isolate South (South Kainuu), ISC – Isolate Central (North Kainuu), ISN – Isolate North (East Lapland).

**Table S4. Common regions of homozygosity (ROHs) in Finnish datasets.**

| Median start and end points for the most common regions of homozygosity of over 1 Mb containing 100 SNPs (ROH) |                   |                 |                    |                  |                  |                |                  |       | Corresponding ROHs in |
|----------------------------------------------------------------------------------------------------------------|-------------------|-----------------|--------------------|------------------|------------------|----------------|------------------|-------|-----------------------|
| chr                                                                                                            | Median start (bp) | Median end (bp) | Median length (kb) | Median n of SNPs | Range start (bp) | Range end (bp) | N of individuals | %     | Lencz et al. 2007     |
| 6p22.1                                                                                                         | 27634876          | 29621771        | 1886.4             | 164              | 16661905         | 42509970       | 294              | 0.274 | roh134                |
| 11q11-q12.1*                                                                                                   | 54847844          | 56608674        | 1612.8             | 110              | 54847844         | 69680337       | 108              | 0.101 | roh242                |
| 2q21.2-q21.3                                                                                                   | 134674699         | 136914881       | 2292.4             | 134              | 114633578        | 149732466      | 101              | 0.094 | roh45                 |
| 6p22.1-p21.33                                                                                                  | 29233258          | 31051974        | 2699.6             | 372              | 16661905         | 42509970       | 88               | 0.082 | roh135                |
| 11p11.2-p11.12*                                                                                                | 46192202          | 51171349        | 4910.1             | 119              | 36762573         | 51171349       | 74               | 0.069 | roh241                |
| 3p21.31-p21.2                                                                                                  | 46723457          | 52222150        | 4802.2             | 150              | 31825667         | 59534529       | 65               | 0.061 | roh67, roh68          |
| 7q31.2-q31.31                                                                                                  | 117005747         | 119959341       | 2936.0             | 127              | 103431741        | 134965377      | 64               | 0.060 | roh161                |
| 5q23.3                                                                                                         | 128895709         | 132158923       | 3028.4             | 136              | 119697356        | 141425958      | 64               | 0.060 | roh125                |
| 21q21.3                                                                                                        | 28699920          | 30144382        | 1506.9             | 129              | 19329569         | 46909175       | 63               | 0.059 | roh337                |
| 7q31.33-q32.1                                                                                                  | 125281446         | 127463642       | 1832.0             | 181              | 110890180        | 134965377      | 60               | 0.056 | roh162, roh163        |
| 15q21.2-q21.3                                                                                                  | 47988823          | 50775480        | 2423.8             | 177              | 27014674         | 60526755       | 56               | 0.052 | roh297, roh298        |
| 9q33.3-q34.11                                                                                                  | 126585163         | 127972499       | 1406.0             | 119              | 119161372        | 135749021      | 53               | 0.049 | -                     |
| 6p21.33-p21.32                                                                                                 | 30527810          | 33080865        | 3167.6             | 482              | 16661905         | 42509970       | 53               | 0.049 | -                     |
| 5p12-p11*                                                                                                      | 43624705          | 46141920        | 2517.2             | 114              | 33612359         | 46141920       | 52               | 0.048 | roh116                |
| 3p12.2-3p12.1                                                                                                  | 83149702          | 87131092        | 2671.5             | 139              | 62070731         | 90277042       | 50               | 0.047 | roh75                 |
| 2q32.3-q33.1                                                                                                   | 195792579         | 198787749       | 2559.9             | 128              | 168470913        | 215165289      | 49               | 0.046 | roh56                 |
| 7q21.13                                                                                                        | 89010429          | 90424659        | 1412.9             | 141              | 82794215         | 94936200       | 48               | 0.045 | -                     |
| 11q14.1-q14.2                                                                                                  | 83692371          | 86288053        | 2182.7             | 191              | 74746415         | 106868669      | 48               | 0.045 | -                     |
| 12q21.31-q21.33                                                                                                | 83736199          | 86846945        | 3322.1             | 171              | 55541402         | 105140343      | 47               | 0.044 | roh271, roh272        |
| 8q11.1-q11.21*                                                                                                 | 47901302          | 52501487        | 4089.4             | 124              | 47062007         | 71033622       | 47               | 0.044 | roh172                |

Segments >1Mb and 100 SNPs and present in  $\geq 47$  individuals are included. \* centromeric region

Table S5. Homozygous segments of  $\geq 10$  Mb on the autosomes in Finnish samples.

| Sample ID | Chr | Start (bp) | End (bp)  | Length (Mb) | SNPs (n) | Start SNP  | End SNP    | SNP density |
|-----------|-----|------------|-----------|-------------|----------|------------|------------|-------------|
| ESW2_5    | 1   | 20729860   | 31056811  | 10.327      | 738      | rs640742   | rs6425689  | 13.993      |
| HEL_7     | 1   | 22591578   | 48302845  | 25.711      | 1795     | rs6426752  | rs728864   | 14.324      |
| LSN_26    | 1   | 37239880   | 52554291  | 15.314      | 943      | rs709303   | rs1983833  | 16.24       |
| HEL_1     | 1   | 38048389   | 63317837  | 25.269      | 1933     | rs473279   | rs10749737 | 13.073      |
| HEL_11    | 1   | 48255784   | 82334147  | 34.078      | 2692     | rs1693258  | rs962249   | 12.659      |
| ISC_26    | 1   | 68357929   | 80994194  | 12.636      | 849      | rs2419659  | rs11576922 | 14.884      |
| ESW1_36   | 1   | 76660065   | 101901271 | 25.241      | 1858     | rs7536778  | rs2289810  | 13.585      |
| ESW1_4    | 1   | 83728341   | 96827070  | 13.099      | 1009     | rs1038148  | rs6673531  | 12.982      |
| ISC_34    | 1   | 85774932   | 95857288  | 10.082      | 747      | rs4949911  | rs12120304 | 13.497      |
| ISS_11    | 1   | 87528817   | 119987689 | 32.459      | 2386     | rs1336945  | rs539426   | 13.604      |
| ISC_12    | 1   | 98476453   | 112400064 | 13.924      | 1058     | rs12120750 | rs155646   | 13.16       |
| LSN_21    | 1   | 102776195  | 115384849 | 12.609      | 963      | rs967554   | rs1321110  | 13.093      |
| ISC_8     | 1   | 110781375  | 120902276 | 10.121      | 788      | rs6700661  | rs12146056 | 12.844      |
| LSN_23    | 1   | 150214737  | 162786304 | 12.572      | 1115     | rs3006423  | rs10800183 | 11.275      |
| LSN_9     | 1   | 168501896  | 179015009 | 10.513      | 742      | rs11587288 | rs2494467  | 14.169      |
| ISN_23    | 1   | 172383443  | 185366707 | 12.983      | 935      | rs4233164  | rs12024989 | 13.886      |
| LSW_6     | 1   | 174729366  | 189293369 | 14.564      | 930      | rs946817   | rs1407818  | 15.66       |
| ESN_19    | 1   | 176491040  | 198139439 | 21.648      | 1412     | rs3905112  | rs6697016  | 15.332      |
| LSC_2     | 1   | 176932841  | 197666089 | 20.733      | 1301     | rs6425616  | rs4915471  | 15.936      |
| ISN_16    | 1   | 186548614  | 204902123 | 18.354      | 1314     | rs2176360  | rs6695225  | 13.968      |
| ISC_15    | 1   | 203097930  | 225411880 | 22.314      | 1803     | rs7523985  | rs603404   | 12.376      |
| ISS_24    | 1   | 211508748  | 236714517 | 25.206      | 2172     | rs1377185  | rs7520065  | 11.605      |
| ESN_6     | 1   | 218983453  | 231397143 | 12.414      | 1032     | rs1906273  | rs10910534 | 12.029      |
| HEL_12    | 1   | 228495766  | 242616608 | 14.121      | 1472     | rs751645   | rs1471764  | 9.593       |
| ISC_25    | 1   | 234099468  | 245420458 | 11.321      | 1072     | rs1717783  | rs6704311  | 10.561      |
| HEL_17    | 2   | 3281969    | 16245423  | 12.963      | 1334     | rs4546035  | rs10201439 | 9.718       |
| ESW1_6    | 2   | 8512337    | 30938388  | 22.426      | 1944     | rs1872603  | rs7597567  | 11.536      |
| ESS_3     | 2   | 15149566   | 26294996  | 11.145      | 910      | rs1430802  | rs13383267 | 12.248      |
| ESN_7     | 2   | 16169308   | 36275815  | 20.107      | 1702     | rs4669035  | rs305175   | 11.813      |
| ISN_7     | 2   | 18683965   | 41299772  | 22.616      | 1943     | rs2346137  | rs9309065  | 11.64       |
| ISN_10    | 2   | 23596040   | 45933257  | 22.337      | 2009     | rs4665594  | rs4952775  | 11.119      |
| LSN_11    | 2   | 43270712   | 58342819  | 15.072      | 1589     | rs12466022 | rs1404460  | 9.485       |
| LSN_16    | 2   | 46830983   | 57093281  | 10.262      | 1065     | rs970711   | rs1035974  | 9.636       |
| LSN_2     | 2   | 47020802   | 60317142  | 13.296      | 1332     | rs935378   | rs2160069  | 9.982       |
| ISC_18    | 2   | 49421428   | 86970238  | 37.549      | 3233     | rs1365862  | rs4832054  | 11.614      |
| ISS_14    | 2   | 52396670   | 67922352  | 15.526      | 1411     | rs6735211  | rs881645   | 11.003      |
| ESN_7     | 2   | 53507998   | 70783948  | 17.276      | 1525     | rs2059315  | rs880848   | 11.328      |
| LSC_7     | 2   | 53771448   | 74137089  | 20.366      | 1731     | rs1468984  | rs13416937 | 11.765      |

The American Journal of Human Genetics, Volume 83

|         |   |           |           |        |      |            |            |        |
|---------|---|-----------|-----------|--------|------|------------|------------|--------|
| ISN_4   | 2 | 75589189  | 86970238  | 11.381 | 894  | rs12619807 | rs4832054  | 12.73  |
| LSN_10  | 2 | 94851298  | 111236974 | 16.386 | 1000 | rs11885687 | rs4556988  | 16.386 |
| LSN_23  | 2 | 94851298  | 107252764 | 12.401 | 830  | rs11885687 | rs2215482  | 14.942 |
| ISC_18  | 2 | 94851298  | 105494098 | 10.643 | 636  | rs11885687 | rs1914748  | 16.734 |
| ISS_26  | 2 | 96584846  | 109141380 | 12.557 | 904  | rs2118836  | rs260658   | 13.89  |
| ISS_22  | 2 | 105524024 | 120782541 | 15.259 | 1005 | rs884876   | rs2043722  | 15.183 |
| ESN_10  | 2 | 114633578 | 137950065 | 23.316 | 1569 | rs1367423  | rs1453293  | 14.861 |
| HEL_7   | 2 | 121208022 | 149615204 | 28.407 | 1924 | rs707482   | rs922860   | 14.765 |
| ISC_37  | 2 | 128895469 | 165175409 | 36.280 | 2424 | rs4662808  | rs3828191  | 14.967 |
| LSN_12  | 2 | 136871118 | 152574121 | 15.703 | 1084 | rs4954599  | rs13421962 | 14.486 |
| ISC_4   | 2 | 140786202 | 151321205 | 10.535 | 717  | rs10496837 | rs2341081  | 14.693 |
| LSN_23  | 2 | 144468402 | 165684504 | 21.216 | 1399 | rs1868078  | rs10497256 | 15.165 |
| ISN_25  | 2 | 157373875 | 168451388 | 11.078 | 717  | rs6740709  | rs6741880  | 15.45  |
| ISC_37  | 2 | 165244516 | 178485690 | 13.241 | 1092 | rs1474249  | rs6737872  | 12.126 |
| ISC_7   | 2 | 165286311 | 185105923 | 19.820 | 1592 | rs6707635  | rs10931138 | 12.45  |
| ISS_5   | 2 | 165935141 | 189894682 | 23.960 | 1756 | rs10182570 | rs10755002 | 13.644 |
| ISN_13  | 2 | 168470913 | 201429942 | 32.959 | 2180 | rs836692   | rs951183   | 15.119 |
| LSC_8   | 2 | 169955143 | 192055098 | 22.100 | 1540 | rs830995   | rs13431098 | 14.351 |
| LSW_9   | 2 | 172498960 | 182678712 | 10.180 | 833  | rs6716901  | rs1196290  | 12.221 |
| ESN_16  | 2 | 174092788 | 213384735 | 39.292 | 2617 | rs1865236  | rs7580519  | 15.014 |
| LSC_2   | 2 | 177665143 | 192215438 | 14.550 | 898  | rs1113669  | rs10208726 | 16.203 |
| ISN_9   | 2 | 181134445 | 192209472 | 11.075 | 584  | rs4894185  | rs2356653  | 18.964 |
| ESW1_3  | 2 | 183921485 | 197900971 | 13.979 | 662  | rs1462531  | rs2697307  | 21.117 |
| ISS_1   | 2 | 192640829 | 209699494 | 17.059 | 1096 | rs10170778 | rs2364820  | 15.564 |
| ISN_11  | 2 | 192806544 | 215165289 | 22.359 | 1515 | rs6434535  | rs4673830  | 14.758 |
| ESW1_34 | 2 | 192827369 | 203865712 | 11.038 | 581  | rs10166176 | rs7600392  | 18.999 |
| ISS_23  | 2 | 194714006 | 213584623 | 18.871 | 1351 | rs7600163  | rs1482581  | 13.968 |
| HEL_4   | 2 | 204762286 | 216922309 | 12.160 | 1061 | rs7607984  | rs1877104  | 11.461 |
| ISN_1   | 2 | 208825676 | 219093286 | 10.268 | 854  | rs4375849  | rs2227255  | 12.023 |
| ESW1_19 | 3 | 6188499   | 17165593  | 10.977 | 1186 | rs10510331 | rs17043135 | 9.256  |
| LSN_12  | 3 | 7001341   | 22549173  | 15.548 | 1543 | rs670764   | rs2358693  | 10.076 |
| ESW1_32 | 3 | 8234491   | 22074790  | 13.840 | 1316 | rs9312006  | rs779158   | 10.517 |
| ESN_10  | 3 | 16302913  | 30200327  | 13.897 | 1261 | rs6777976  | rs2196131  | 11.021 |
| ISS_13  | 3 | 31825667  | 57932080  | 26.106 | 1737 | rs7649767  | rs1658367  | 15.03  |
| ISS_27  | 3 | 32980234  | 53584650  | 20.604 | 1164 | rs6795737  | rs709317   | 17.701 |
| ESW1_14 | 3 | 42509046  | 55324472  | 12.815 | 732  | rs342520   | rs358810   | 17.507 |
| LSN_2   | 3 | 45220637  | 59534529  | 14.314 | 939  | rs7648149  | rs6765225  | 15.244 |
| HEL_9   | 3 | 62070731  | 90277042  | 28.206 | 2157 | rs17632018 | rs6551454  | 13.077 |
| ISC_32  | 3 | 71490580  | 87259104  | 15.769 | 1054 | rs4677611  | rs1497418  | 14.961 |
| HEL_7   | 3 | 74346155  | 90277042  | 15.931 | 854  | rs6780663  | rs6551454  | 18.654 |
| ISS_8   | 3 | 74412529  | 90277042  | 15.865 | 837  | rs12492560 | rs6551454  | 18.954 |

The American Journal of Human Genetics, Volume 83

|         |   |           |           |        |      |            |            |        |
|---------|---|-----------|-----------|--------|------|------------|------------|--------|
| ESW2_7  | 3 | 74562933  | 86350757  | 11.788 | 650  | rs12488030 | rs2048590  | 18.135 |
| HEL_4   | 3 | 74970471  | 90277042  | 15.307 | 796  | rs941304   | rs6551454  | 19.229 |
| LSW_5   | 3 | 77090819  | 90277042  | 13.186 | 694  | rs6766804  | rs6551454  | 19     |
| LSN_15  | 3 | 77104959  | 88039468  | 10.935 | 603  | rs6764089  | rs2919270  | 18.134 |
| LSC_7   | 3 | 77237123  | 88945744  | 11.709 | 633  | rs9859970  | rs10511142 | 18.497 |
| HEL_6   | 3 | 78371380  | 90277042  | 11.906 | 595  | rs7623262  | rs6551454  | 20.01  |
| ISS_12  | 3 | 79482170  | 90277042  | 10.795 | 520  | rs13073607 | rs6551454  | 20.759 |
| ISS_8   | 3 | 95136682  | 106125780 | 10.989 | 555  | rs8178607  | rs10511232 | 19.8   |
| ESW1_15 | 3 | 95136682  | 105164123 | 10.027 | 490  | rs8178607  | rs6782375  | 20.464 |
| ESN_11  | 3 | 95136682  | 111483418 | 16.347 | 980  | rs8178607  | rs2713001  | 16.68  |
| HEL_4   | 3 | 95136682  | 118416541 | 23.280 | 1507 | rs8178607  | rs9856565  | 15.448 |
| HEL_6   | 3 | 95136682  | 128383804 | 33.247 | 2369 | rs8178607  | rs11710590 | 14.034 |
| HEL_7   | 3 | 95136682  | 118638930 | 23.502 | 1529 | rs8178607  | rs6806321  | 15.371 |
| HEL_9   | 3 | 95136682  | 116924298 | 21.788 | 1366 | rs8178607  | rs7638530  | 15.95  |
| ISC_21  | 3 | 103725414 | 117938404 | 14.213 | 1006 | rs1151324  | rs9841113  | 14.128 |
| ISS_16  | 3 | 106853033 | 119478154 | 12.625 | 965  | rs9857831  | rs10934444 | 13.083 |
| LSN_20  | 3 | 121734795 | 132871718 | 11.137 | 832  | rs1370743  | rs7613777  | 13.386 |
| ESS_2   | 3 | 122690866 | 134672014 | 11.981 | 962  | rs3218651  | rs9289448  | 12.454 |
| ESW1_12 | 3 | 123563437 | 134655072 | 11.092 | 885  | rs4491840  | rs2078262  | 12.533 |
| ESN_12  | 3 | 126302983 | 141597182 | 15.294 | 1196 | rs2788462  | rs1383019  | 12.788 |
| ISS_11  | 3 | 142044163 | 160655776 | 18.612 | 1452 | rs2139269  | rs4142769  | 12.818 |
| ISN_19  | 3 | 142529557 | 156955436 | 14.426 | 1148 | rs4683600  | rs4680216  | 12.566 |
| ISN_11  | 3 | 144349211 | 163025373 | 18.676 | 1434 | rs6805378  | rs7620420  | 13.024 |
| HEL_4   | 3 | 144576607 | 158559548 | 13.983 | 1132 | rs1525006  | rs10513512 | 12.352 |
| ISN_20  | 3 | 144965571 | 156312609 | 11.347 | 873  | rs1349001  | rs9853221  | 12.998 |
| HEL_16  | 3 | 148479699 | 168770372 | 20.291 | 1426 | rs7645827  | rs4552347  | 14.229 |
| LSC_6   | 3 | 153739442 | 166504936 | 12.765 | 803  | rs6771654  | rs9872521  | 15.897 |
| ESN_10  | 3 | 157237923 | 168980146 | 11.742 | 692  | rs9810320  | rs9815034  | 16.969 |
| ESW2_9  | 3 | 157487656 | 168603702 | 11.116 | 650  | rs13082914 | rs1403646  | 17.102 |
| LSN_22  | 3 | 161179700 | 173568967 | 12.389 | 788  | rs9811792  | rs9917745  | 15.722 |
| HE_10   | 3 | 163310454 | 188001830 | 24.691 | 1878 | rs1397235  | rs1648703  | 13.148 |
| ISC_30  | 3 | 177899841 | 193587757 | 15.688 | 1417 | rs6787082  | rs1525910  | 11.071 |
| HEL_2   | 3 | 187843103 | 199278302 | 11.435 | 1153 | rs3733159  | rs12639242 | 9.918  |
| ESW1_18 | 4 | 11203025  | 26799216  | 15.596 | 1438 | rs1994958  | rs969949   | 10.846 |
| LSW_10  | 4 | 20255641  | 42706036  | 22.450 | 1918 | rs7666974  | rs10012449 | 11.705 |
| ESW1_7  | 4 | 26681504  | 37225175  | 10.544 | 720  | rs4692137  | rs12646961 | 14.644 |
| LSC_4   | 4 | 28724473  | 42107001  | 13.383 | 1057 | rs7677192  | rs13103573 | 12.661 |
| ISC_31  | 4 | 38322884  | 48902776  | 10.580 | 793  | rs4833063  | rs12696828 | 13.342 |
| LSN_19  | 4 | 52524535  | 62568307  | 10.044 | 704  | rs1910739  | rs6551665  | 14.267 |
| ISC_31  | 4 | 52524535  | 78111798  | 25.587 | 1529 | rs1910739  | rs12500486 | 16.735 |
| ESW1_20 | 4 | 56312479  | 75436762  | 19.124 | 1049 | rs3805382  | rs556808   | 18.231 |

The American Journal of Human Genetics, Volume 83

|         |   |           |           |        |      |            |            |        |
|---------|---|-----------|-----------|--------|------|------------|------------|--------|
| ESN_7   | 4 | 58051742  | 83332524  | 25.281 | 1460 | rs2691390  | rs971825   | 17.316 |
| ESW1_30 | 4 | 61776620  | 73629403  | 11.853 | 603  | rs1486506  | rs10019624 | 19.656 |
| ESS_1   | 4 | 62222412  | 92173961  | 29.952 | 1858 | rs186750   | rs11946311 | 16.12  |
| ESW1_34 | 4 | 71569311  | 83332524  | 11.763 | 716  | rs7660807  | rs971825   | 16.429 |
| LSN_3   | 4 | 78183268  | 90526003  | 12.343 | 894  | rs904050   | rs7672015  | 13.806 |
| LSN_19  | 4 | 82991989  | 108957150 | 25.965 | 1716 | rs6834681  | rs727137   | 15.131 |
| LSC_3   | 4 | 95611908  | 110902300 | 15.290 | 977  | rs10516950 | rs6832174  | 15.65  |
| HEL_1   | 4 | 101873020 | 113848055 | 11.975 | 747  | rs10010359 | rs4555714  | 16.031 |
| LSN_24  | 4 | 106766530 | 122501269 | 15.735 | 1018 | rs11097891 | rs6835704  | 15.457 |
| ESW1_20 | 4 | 109391583 | 133290461 | 23.899 | 1582 | rs10022956 | rs4863859  | 15.107 |
| ESW2_8  | 4 | 114672302 | 127053913 | 12.382 | 859  | rs2037673  | rs4394015  | 14.414 |
| ESN_13  | 4 | 116246842 | 140125102 | 23.878 | 1543 | rs2165543  | rs2135290  | 15.475 |
| ISC_11  | 4 | 121245610 | 141090559 | 19.845 | 1307 | rs10518347 | rs795991   | 15.184 |
| ESN_18  | 4 | 122281203 | 133789026 | 11.508 | 733  | rs12503473 | rs2013016  | 15.7   |
| ESW2_1  | 4 | 123021065 | 133423137 | 10.402 | 658  | rs4283687  | rs13118884 | 15.809 |
| ESW2_12 | 4 | 124125548 | 139659349 | 15.534 | 959  | rs308420   | rs12505439 | 16.198 |
| ISN_25  | 4 | 129942768 | 153427388 | 23.485 | 1465 | rs11098979 | rs6823091  | 16.03  |
| ISC_38  | 4 | 131451159 | 149614719 | 18.164 | 1139 | rs6827503  | rs7680420  | 15.947 |
| ISS_14  | 4 | 140936647 | 151333605 | 10.397 | 653  | rs3755992  | rs4835617  | 15.922 |
| ISC_1   | 4 | 142332954 | 153843037 | 11.510 | 647  | rs2042630  | rs4696324  | 17.79  |
| ISN_3   | 4 | 149562396 | 164202986 | 14.641 | 1007 | rs4087963  | rs4317161  | 14.539 |
| ISN_8   | 4 | 149642030 | 166604790 | 16.963 | 1183 | rs2137330  | rs7698056  | 14.339 |
| ISS_29  | 4 | 154246245 | 177454523 | 23.208 | 1651 | rs1018316  | rs2128422  | 14.057 |
| ESW1_8  | 4 | 156497670 | 167032117 | 10.534 | 768  | rs9990860  | rs191644   | 13.717 |
| LSC_8   | 4 | 157011974 | 168212437 | 11.200 | 775  | rs1483030  | rs6846723  | 14.452 |
| HEL_7   | 4 | 170172456 | 181612624 | 11.440 | 848  | rs1458292  | rs7674341  | 13.491 |
| ISS_12  | 5 | 4686409   | 17246633  | 12.560 | 1215 | rs10512742 | rs585991   | 10.338 |
| HEL_2   | 5 | 9443217   | 24826796  | 15.384 | 1152 | rs390322   | rs1835228  | 13.354 |
| LSN_17  | 5 | 11601147  | 22229724  | 10.629 | 703  | rs2561596  | rs6883351  | 15.119 |
| ESW1_22 | 5 | 33612359  | 46141920  | 12.530 | 836  | rs3813474  | rs7720482  | 14.988 |
| ISS_11  | 5 | 36067627  | 46141920  | 10.074 | 619  | rs2453299  | rs7720482  | 16.275 |
| LSN_4   | 5 | 54277851  | 65639395  | 11.362 | 894  | rs6450264  | rs10515005 | 12.709 |
| ISN_12  | 5 | 74028637  | 89658424  | 15.630 | 1177 | rs10805890 | rs1434599  | 13.279 |
| LSN_22  | 5 | 76485946  | 94355556  | 17.870 | 1241 | rs6864250  | rs722722   | 14.399 |
| ISC_20  | 5 | 82054027  | 118011511 | 35.957 | 2516 | rs6863156  | rs2972219  | 14.292 |
| LSN_25  | 5 | 84112061  | 95001348  | 10.889 | 599  | rs1158242  | rs6890832  | 18.179 |
| ISS_21  | 5 | 85958923  | 106877573 | 20.919 | 1252 | rs17476583 | rs152555   | 16.708 |
| ESW1_5  | 5 | 96376466  | 118288687 | 21.912 | 1657 | rs2303138  | rs2377127  | 13.224 |
| ISN_4   | 5 | 109631231 | 123826877 | 14.196 | 1195 | rs4505994  | rs4574539  | 11.879 |
| ESW1_6  | 5 | 119697356 | 134858680 | 15.161 | 1146 | rs1368183  | rs7714565  | 13.23  |
| HEL_6   | 5 | 123543628 | 141371716 | 17.828 | 1261 | rs4836064  | rs164080   | 14.138 |



The American Journal of Human Genetics, Volume 83

|         |   |           |           |        |      |            |            |        |
|---------|---|-----------|-----------|--------|------|------------|------------|--------|
| ISS_24  | 5 | 125915614 | 141259534 | 15.344 | 978  | rs12514417 | rs9324859  | 15.689 |
| ISC_10  | 5 | 126168249 | 141425958 | 15.258 | 981  | rs968355   | rs252152   | 15.553 |
| ISC_16  | 5 | 134605656 | 162604595 | 27.999 | 2288 | rs6896456  | rs2964350  | 12.237 |
| HEL_15  | 5 | 134637721 | 145265514 | 10.628 | 755  | rs4976285  | rs3995498  | 14.077 |
| LSN_22  | 5 | 139370651 | 158804399 | 19.434 | 1703 | rs265158   | rs7721176  | 11.411 |
| ESN_4   | 5 | 146733197 | 157316100 | 10.583 | 960  | rs4235731  | rs10515756 | 11.024 |
| ESW1_33 | 5 | 150848938 | 162876986 | 12.028 | 1033 | rs2278372  | rs4869089  | 11.644 |
| ESW1_9  | 5 | 150881806 | 167727354 | 16.846 | 1452 | rs2053028  | rs1030182  | 11.602 |
| LSN_23  | 5 | 153692360 | 165994213 | 12.302 | 1044 | rs6580074  | rs6878847  | 11.783 |
| HE_10   | 5 | 159077687 | 170918445 | 11.841 | 1093 | rs6867494  | rs7720865  | 10.833 |
| ESN_8   | 5 | 165819398 | 179998061 | 14.179 | 1460 | rs1799594  | rs4700745  | 9.711  |
| ESW1_10 | 5 | 166692434 | 178004940 | 11.313 | 1193 | rs4868792  | rs3925517  | 9.482  |
| ISN_9   | 6 | 12643097  | 23466218  | 10.823 | 1090 | rs2504853  | rs9379502  | 9.929  |
| HEL_1   | 6 | 16661905  | 42514998  | 25.853 | 2956 | rs2237182  | rs694148   | 8.746  |
| HEL_6   | 6 | 20521796  | 39151970  | 18.630 | 2198 | rs9465734  | rs2268645  | 8.476  |
| ESN_15  | 6 | 22146505  | 41479096  | 19.333 | 2247 | rs1207774  | rs17538671 | 8.604  |
| LSN_19  | 6 | 24136382  | 36814135  | 12.678 | 1478 | rs7761213  | rs12196180 | 8.578  |
| ESW2_12 | 6 | 25475689  | 37707940  | 12.232 | 1446 | rs10456044 | rs6926735  | 8.459  |
| ESW2_5  | 6 | 25607874  | 37201464  | 11.594 | 1355 | rs7760799  | rs10807178 | 8.556  |
| ISS_19  | 6 | 25787939  | 38847145  | 13.059 | 1501 | rs2205935  | rs13219077 | 8.7    |
| HEL_4   | 6 | 37145648  | 53772666  | 16.627 | 1537 | rs4714034  | rs4342426  | 10.818 |
| ESW1_24 | 6 | 39285552  | 53574759  | 14.289 | 1249 | rs9462492  | rs492381   | 11.441 |
| ISN_15  | 6 | 42259213  | 56223185  | 13.964 | 1133 | rs1997980  | rs6931381  | 12.325 |
| ISS_12  | 6 | 64044694  | 104441372 | 40.397 | 2980 | rs1320102  | rs9499687  | 13.556 |
| LSW_2   | 6 | 71374792  | 81935474  | 10.561 | 739  | rs2691511  | rs7773268  | 14.291 |
| LSW_8   | 6 | 74434186  | 85169956  | 10.736 | 705  | rs3846752  | rs10484975 | 15.228 |
| LSC_8   | 6 | 77978621  | 88572771  | 10.594 | 736  | rs4265000  | rs722903   | 14.394 |
| ESN_2   | 6 | 79231356  | 89911155  | 10.680 | 790  | rs6927933  | rs12215916 | 13.519 |
| LSN_1   | 6 | 89353589  | 102165584 | 12.812 | 1001 | rs9294406  | rs513216   | 12.799 |
| ESN_14  | 6 | 90679134  | 102219857 | 11.541 | 902  | rs690824   | rs1415483  | 12.795 |
| HEL_8   | 6 | 94139844  | 104147362 | 10.008 | 676  | rs351328   | rs9399834  | 14.804 |
| LSW_3   | 6 | 98347163  | 109689879 | 11.343 | 899  | rs595074   | rs1040285  | 12.617 |
| ISC_14  | 6 | 102732985 | 115165540 | 12.433 | 1002 | rs9485630  | rs4946020  | 12.408 |
| ISS_25  | 6 | 107567039 | 126478941 | 18.912 | 1480 | rs4946815  | rs10499133 | 12.778 |
| LSN_5   | 6 | 108415352 | 118880302 | 10.465 | 773  | rs2050042  | rs11153748 | 13.538 |
| ISN_9   | 6 | 110788572 | 133494118 | 22.706 | 1797 | rs12664330 | rs3904628  | 12.635 |
| ISC_33  | 6 | 112757899 | 130577705 | 17.820 | 1346 | rs1935681  | rs6934450  | 13.239 |
| ISC_20  | 6 | 127560927 | 138379900 | 10.819 | 951  | rs10457487 | rs6570205  | 11.376 |
| HEL_13  | 6 | 128634827 | 145667901 | 17.033 | 1497 | rs6923988  | rs9386110  | 11.378 |
| ESW1_28 | 6 | 138291449 | 151350224 | 13.059 | 1125 | rs9402927  | rs2073189  | 11.608 |
| ESW2_2  | 6 | 139678865 | 151373681 | 11.695 | 989  | rs7770507  | rs1771798  | 11.825 |

The American Journal of Human Genetics, Volume 83

|         |   |           |           |        |      |            |            |        |
|---------|---|-----------|-----------|--------|------|------------|------------|--------|
| LSW_3   | 6 | 139733915 | 151245619 | 11.512 | 956  | rs9495456  | rs803410   | 12.042 |
| ISS_22  | 6 | 157993104 | 168285060 | 10.292 | 1129 | rs16900291 | rs9295041  | 9.116  |
| ISS_13  | 7 | 3951077   | 15677745  | 11.727 | 1157 | rs582046   | rs38191    | 10.135 |
| ISS_11  | 7 | 4496775   | 20288995  | 15.792 | 1544 | rs9791644  | rs6461502  | 10.228 |
| ISC_20  | 7 | 7123923   | 43197352  | 36.073 | 3720 | rs10486157 | rs10246620 | 9.697  |
| ESW1_16 | 7 | 7561382   | 24705586  | 17.144 | 1843 | rs1541549  | rs10486438 | 9.302  |
| ESW1_10 | 7 | 11438971  | 29591212  | 18.152 | 2031 | rs3846988  | rs2041755  | 8.938  |
| HEL_12  | 7 | 22799595  | 57834528  | 35.035 | 3149 | rs4722187  | rs6959914  | 11.126 |
| ISN_12  | 7 | 96090911  | 106922488 | 10.832 | 768  | rs767198   | rs1858930  | 14.104 |
| LSN_8   | 7 | 98816100  | 108939772 | 10.124 | 757  | rs952319   | rs990943   | 13.373 |
| ISS_8   | 7 | 101382289 | 114540520 | 13.158 | 888  | rs10243429 | rs10233079 | 14.818 |
| ESW2_11 | 7 | 101507570 | 114763138 | 13.256 | 895  | rs1725604  | rs11983531 | 14.811 |
| ISC_25  | 7 | 103431741 | 124695615 | 21.264 | 1373 | rs6950715  | rs1316624  | 15.487 |
| LSN_9   | 7 | 110890180 | 134965377 | 24.075 | 1654 | rs2613577  | rs17810062 | 14.556 |
| ISC_29  | 7 | 115084230 | 126306069 | 11.222 | 695  | rs2896169  | rs1156653  | 16.147 |
| LSN_16  | 7 | 116433901 | 127047977 | 10.614 | 683  | rs193579   | rs737242   | 15.54  |
| ESW1_35 | 7 | 117161442 | 128332495 | 11.171 | 721  | rs1548460  | rs4728152  | 15.494 |
| LSN_25  | 7 | 142627599 | 153882109 | 11.255 | 871  | rs11771145 | rs7787632  | 12.921 |
| HEL_4   | 8 | 8135489   | 26054360  | 17.919 | 2154 | rs2955587  | rs2976271  | 8.319  |
| ISS_24  | 8 | 20013209  | 35185764  | 15.173 | 1420 | rs16842    | rs1451360  | 10.685 |
| ISS_30  | 8 | 21642357  | 31944674  | 10.302 | 1003 | rs4506202  | rs1023911  | 10.272 |
| ISN_2   | 8 | 31241311  | 43910848  | 12.670 | 749  | rs7812391  | rs10958798 | 16.915 |
| ISN_26  | 8 | 33359626  | 43910848  | 10.551 | 574  | rs11996351 | rs10958798 | 18.382 |
| ISN_26  | 8 | 47062007  | 71033622  | 23.972 | 1713 | rs7836486  | rs389540   | 13.994 |
| LSN_8   | 8 | 69803337  | 85163427  | 15.360 | 1385 | rs12544474 | rs4285486  | 11.09  |
| ISN_10  | 8 | 71611999  | 97095554  | 25.484 | 2081 | rs10106858 | rs261579   | 12.246 |
| ISC_2   | 8 | 85163427  | 99219109  | 14.056 | 1134 | rs4285486  | rs717229   | 12.395 |
| LSN_7   | 8 | 91255894  | 101738096 | 10.482 | 913  | rs10956500 | rs1693586  | 11.481 |
| ISS_24  | 8 | 102611617 | 137655262 | 35.044 | 3636 | rs2127035  | rs305291   | 9.638  |
| ISS_18  | 8 | 103762929 | 114534332 | 10.771 | 885  | rs2513924  | rs2954898  | 12.171 |
| LSN_3   | 8 | 103784402 | 118830681 | 15.046 | 1218 | rs2511694  | rs1396353  | 12.353 |
| ISC_32  | 8 | 104319015 | 120364973 | 16.046 | 1321 | rs11785583 | rs2033042  | 12.147 |
| ESN_10  | 8 | 105874665 | 118629672 | 12.755 | 967  | rs10505066 | rs922587   | 13.19  |
| HEL_16  | 8 | 106193547 | 116239753 | 10.046 | 744  | rs1460586  | rs7836816  | 13.503 |
| ISS_11  | 8 | 108213610 | 121010709 | 12.797 | 992  | rs2022943  | rs4871793  | 12.9   |
| ISN_14  | 8 | 121424143 | 133549511 | 12.125 | 1408 | rs2290524  | rs6997998  | 8.612  |
| ESW1_1  | 9 | 4866997   | 15520283  | 10.653 | 1450 | rs913259   | rs7871956  | 7.347  |
| HEL_2   | 9 | 12916571  | 39088698  | 26.172 | 2811 | rs1412296  | rs4961901  | 9.311  |
| ESW1_34 | 9 | 27634077  | 39088698  | 11.455 | 1012 | rs7847656  | rs4961901  | 11.319 |
| LSC_5   | 9 | 68213926  | 79111961  | 10.898 | 1141 | rs449851   | rs4486277  | 9.551  |
| ESW2_16 | 9 | 73039947  | 83316154  | 10.276 | 1089 | rs4581121  | rs7850633  | 9.436  |

The American Journal of Human Genetics, Volume 83

|         |    |           |           |        |      |            |            |        |
|---------|----|-----------|-----------|--------|------|------------|------------|--------|
| ESW1_28 | 9  | 85937273  | 98413008  | 12.476 | 1163 | rs11141229 | rs928425   | 10.727 |
| ISC_14  | 9  | 87185012  | 99096446  | 11.911 | 1096 | rs4878060  | rs438824   | 10.868 |
| HEL_6   | 9  | 87204305  | 114586263 | 27.382 | 2803 | rs2841452  | rs7044734  | 9.769  |
| ISS_13  | 9  | 87276537  | 101706263 | 14.430 | 1292 | rs7025941  | rs1012203  | 11.169 |
| ISC_4   | 9  | 89942040  | 122072378 | 32.130 | 3312 | rs4744096  | rs3808899  | 9.701  |
| ISC_6   | 9  | 107839477 | 121170338 | 13.331 | 1539 | rs673985   | rs306770   | 8.662  |
| ISC_14  | 9  | 119161372 | 134720764 | 15.559 | 1372 | rs10118663 | rs7020813  | 11.341 |
| ESW1_9  | 9  | 119704780 | 135749021 | 16.044 | 1487 | rs10984729 | rs1333235  | 10.79  |
| HEL_1   | 10 | 125853    | 10672427  | 10.547 | 1374 | rs7906287  | rs10508408 | 7.676  |
| ISC_5   | 10 | 5329074   | 33508462  | 28.179 | 2959 | rs1344354  | rs2506144  | 9.523  |
| ISN_21  | 10 | 11289246  | 30043229  | 18.754 | 1791 | rs10795851 | rs11007707 | 10.471 |
| ESW1_10 | 10 | 12567873  | 30824637  | 18.257 | 1725 | rs2768431  | rs7081639  | 10.584 |
| ESW1_2  | 10 | 16754472  | 34330002  | 17.576 | 1551 | rs10795412 | rs1740713  | 11.332 |
| ESN_20  | 10 | 20550170  | 32069270  | 11.519 | 929  | rs878584   | rs11008620 | 12.399 |
| ISC_19  | 10 | 47065283  | 61465914  | 14.401 | 996  | rs747421   | rs10761445 | 14.458 |
| ISS_4   | 10 | 58677748  | 70868490  | 12.191 | 940  | rs1614490  | rs768498   | 12.969 |
| ESW2_11 | 10 | 61683073  | 72910610  | 11.228 | 988  | rs17806245 | rs2394800  | 11.364 |
| ESN_10  | 10 | 73015070  | 85929011  | 12.914 | 948  | rs7093128  | rs11200905 | 13.622 |
| ISN_26  | 10 | 80543614  | 90773300  | 10.230 | 807  | rs17557872 | rs4934436  | 12.676 |
| ISC_21  | 10 | 81058202  | 98248861  | 17.191 | 1382 | rs1650169  | rs12569424 | 12.439 |
| LSN_18  | 10 | 91293960  | 107497352 | 16.203 | 1218 | rs12415606 | rs2111995  | 13.303 |
| ESW2_3  | 10 | 98406314  | 109362304 | 10.956 | 787  | rs3827867  | rs10509839 | 13.921 |
| ISS_12  | 10 | 98423410  | 115634030 | 17.211 | 1283 | rs10509712 | rs7913176  | 13.414 |
| ESN_1   | 10 | 102498567 | 114720787 | 12.222 | 866  | rs4244341  | rs12573128 | 14.113 |
| ESW1_23 | 11 | 4548315   | 43376486  | 38.828 | 3425 | rs10768096 | rs17508783 | 11.337 |
| ISS_23  | 11 | 11032632  | 26611157  | 15.579 | 1442 | rs1586381  | rs7938949  | 10.803 |
| HEL_1   | 11 | 12210124  | 34238805  | 22.029 | 1730 | rs2131771  | rs10836178 | 12.733 |
| ISC_29  | 11 | 20723082  | 32818969  | 12.096 | 846  | rs1401792  | rs7944652  | 14.298 |
| ISN_18  | 11 | 24489680  | 36361306  | 11.872 | 890  | rs1995837  | rs330255   | 13.339 |
| ISC_28  | 11 | 36762573  | 51171349  | 14.409 | 830  | rs925922   | rs1603756  | 17.36  |
| ISC_38  | 11 | 54847844  | 69540606  | 14.693 | 856  | rs7102501  | rs990177   | 17.164 |
| ESW2_15 | 11 | 54847844  | 69680337  | 14.832 | 869  | rs7102501  | rs3781660  | 17.068 |
| ESN_9   | 11 | 54847844  | 72989900  | 18.142 | 1084 | rs7102501  | rs10751226 | 16.736 |
| HEL_2   | 11 | 54847844  | 69222159  | 14.374 | 840  | rs7102501  | rs3737463  | 17.112 |
| ESW2_10 | 11 | 56868269  | 68857753  | 11.989 | 661  | rs10732882 | rs6606672  | 18.138 |
| ISC_20  | 11 | 60449795  | 77155604  | 16.706 | 1027 | rs628632   | rs569072   | 16.267 |
| ESW2_6  | 11 | 73806781  | 87301357  | 13.495 | 1175 | rs645184   | rs1205609  | 11.485 |
| LSN_14  | 11 | 74746415  | 88879523  | 14.133 | 1234 | rs11236401 | rs319024   | 11.453 |
| ISN_27  | 11 | 76428054  | 87312529  | 10.884 | 977  | rs12422079 | rs2155105  | 11.141 |
| ISS_28  | 11 | 78884823  | 99126002  | 20.241 | 1678 | rs7358419  | rs1441381  | 12.063 |
| ISC_9   | 11 | 80770821  | 106868669 | 26.098 | 2128 | rs1458081  | rs1728909  | 12.264 |

The American Journal of Human Genetics, Volume 83

|         |    |           |           |        |      |            |            |        |
|---------|----|-----------|-----------|--------|------|------------|------------|--------|
| ISS_27  | 11 | 82032626  | 102816825 | 20.784 | 1711 | rs1793025  | rs684308   | 12.147 |
| HEL_3   | 11 | 83565887  | 95364211  | 11.798 | 894  | rs1454027  | rs623543   | 13.197 |
| HEL_5   | 11 | 83684158  | 94319471  | 10.635 | 761  | rs4944478  | rs4753644  | 13.975 |
| ISC_13  | 11 | 87351683  | 98391541  | 11.040 | 824  | rs7925150  | rs6589849  | 13.398 |
| ISS_20  | 11 | 101895031 | 113510423 | 11.615 | 863  | rs7935378  | rs909168   | 13.459 |
| ISC_23  | 11 | 115743244 | 130797173 | 15.054 | 1588 | rs4911111  | rs7481514  | 9.48   |
| HEL_4   | 12 | 3729335   | 20185426  | 16.456 | 1615 | rs11062786 | rs7970511  | 10.19  |
| ESW1_26 | 12 | 13759774  | 24449587  | 10.690 | 919  | rs2300257  | rs1396208  | 11.632 |
| ESW1_19 | 12 | 16289001  | 32216277  | 15.927 | 1551 | rs1852450  | rs11051829 | 10.269 |
| ISC_9   | 12 | 23074232  | 34327658  | 11.253 | 1134 | rs11046743 | rs11053191 | 9.924  |
| ESW2_5  | 12 | 36528296  | 50187657  | 13.659 | 970  | rs12306932 | rs7305599  | 14.082 |
| ISC_15  | 12 | 37736758  | 49711619  | 11.975 | 894  | rs1947234  | rs4471501  | 13.395 |
| ISS_17  | 12 | 47462849  | 61541258  | 14.078 | 955  | rs3730064  | rs10506452 | 14.742 |
| LSW_4   | 12 | 55541402  | 105140343 | 49.599 | 3954 | rs4759035  | rs3782699  | 12.544 |
| ISS_6   | 12 | 70698761  | 90904837  | 20.206 | 1287 | rs1386483  | rs4402333  | 15.7   |
| ISC_36  | 12 | 75809630  | 88617211  | 12.808 | 815  | rs1962167  | rs17782889 | 15.715 |
| ESN_5   | 12 | 77073654  | 90582383  | 13.509 | 797  | rs1020461  | rs1493762  | 16.949 |
| HEL_7   | 12 | 77551551  | 89729173  | 12.178 | 695  | rs10778102 | rs1847459  | 17.522 |
| ISN_5   | 12 | 81640340  | 93061715  | 11.421 | 734  | rs11115376 | rs3843641  | 15.56  |
| ISC_3   | 12 | 97792781  | 120653105 | 22.860 | 2061 | rs201412   | rs1976656  | 11.092 |
| ISS_24  | 12 | 107827075 | 124320871 | 16.494 | 1348 | rs7313861  | rs326363   | 12.236 |
| ISS_28  | 13 | 42363831  | 69503764  | 27.140 | 1968 | rs1359186  | rs2501200  | 13.791 |
| ISC_35  | 13 | 42928966  | 59374237  | 16.445 | 1209 | rs9525776  | rs7339062  | 13.602 |
| ESW2_14 | 13 | 43687180  | 63950463  | 20.263 | 1436 | rs1330101  | rs4883740  | 14.111 |
| ISC_39  | 13 | 45719117  | 65295362  | 19.576 | 1337 | rs1230491  | rs9285252  | 14.642 |
| ISC_24  | 13 | 46049964  | 82292172  | 36.242 | 2753 | rs3742269  | rs1113104  | 13.165 |
| LSN_2   | 13 | 46999437  | 60179190  | 13.180 | 903  | rs1326481  | rs10507655 | 14.596 |
| ESW1_17 | 13 | 50417173  | 64752936  | 14.336 | 926  | rs7336417  | rs10507720 | 15.481 |
| ISC_29  | 13 | 52307163  | 74058654  | 21.751 | 1624 | rs1323103  | rs4883975  | 13.394 |
| ISS_22  | 13 | 75370156  | 90557402  | 15.187 | 1042 | rs9530488  | rs9301708  | 14.575 |
| ISS_28  | 13 | 84070950  | 98245006  | 14.174 | 1051 | rs1446778  | rs812808   | 13.486 |
| LSN_2   | 13 | 84824370  | 94833884  | 10.010 | 725  | rs9531778  | rs7982352  | 13.806 |
| ISC_1   | 13 | 91305888  | 102725899 | 11.420 | 1085 | rs7984514  | rs1529277  | 10.525 |
| LSN_13  | 14 | 25774000  | 36110079  | 10.336 | 852  | rs2064835  | rs427490   | 12.132 |
| ISS_11  | 14 | 31597271  | 45149027  | 13.552 | 1047 | rs1295907  | rs4906584  | 12.943 |
| ESW1_2  | 14 | 33293885  | 52982584  | 19.689 | 1459 | rs1958050  | rs1954333  | 13.495 |
| ESW1_25 | 14 | 34406943  | 50387168  | 15.980 | 1065 | rs3783316  | rs7493885  | 15.005 |
| ISC_27  | 14 | 36561587  | 49144270  | 12.583 | 821  | rs2022725  | rs7148147  | 15.326 |
| ESW1_16 | 14 | 42251644  | 54188545  | 11.937 | 944  | rs1777082  | rs2025130  | 12.645 |
| ISS_3   | 14 | 54252157  | 68440958  | 14.189 | 1063 | rs1957364  | rs3742888  | 13.348 |
| ISS_13  | 14 | 61508365  | 90427626  | 28.919 | 2503 | rs2610541  | rs3783834  | 11.554 |

The American Journal of Human Genetics, Volume 83

|         |    |          |           |        |      |            |            |        |
|---------|----|----------|-----------|--------|------|------------|------------|--------|
| ESN_3   | 14 | 68227881 | 86598814  | 18.371 | 1657 | rs1007841  | rs10498611 | 11.087 |
| ESS_4   | 14 | 69638564 | 82344601  | 12.706 | 1101 | rs7144954  | rs2372236  | 11.54  |
| ESW2_4  | 14 | 76409748 | 90025813  | 13.616 | 1257 | rs11628027 | rs1294497  | 10.832 |
| ISC_22  | 14 | 84568918 | 104135502 | 19.567 | 1793 | rs856627   | rs11160812 | 10.913 |
| ISC_23  | 15 | 27014674 | 59255759  | 32.241 | 2655 | rs6493239  | rs1437543  | 12.144 |
| ISN_6   | 15 | 30057610 | 40077489  | 10.020 | 959  | rs10152238 | rs3743016  | 10.448 |
| ESW1_13 | 15 | 32424988 | 43635213  | 11.210 | 824  | rs8031404  | rs8042811  | 13.605 |
| LSW_1   | 15 | 32863970 | 51156742  | 18.293 | 1324 | rs17818087 | rs1156234  | 13.816 |
| HEL_2   | 15 | 33236262 | 44485438  | 11.249 | 816  | rs11854457 | rs8039174  | 13.786 |
| ESW1_34 | 15 | 34349005 | 50483360  | 16.134 | 1137 | rs1474084  | rs2693467  | 14.19  |
| ISS_9   | 15 | 34836718 | 55531372  | 20.695 | 1508 | rs7183966  | rs2271406  | 13.723 |
| ISS_15  | 15 | 37530269 | 57737182  | 20.207 | 1490 | rs7171244  | rs1871500  | 13.562 |
| ISN_4   | 15 | 44053780 | 60526755  | 16.473 | 1449 | rs2460626  | rs1066677  | 11.369 |
| ISN_21  | 15 | 44085750 | 55534072  | 11.448 | 874  | rs2460620  | rs1280409  | 13.099 |
| ISS_7   | 15 | 57906822 | 69331029  | 11.424 | 970  | rs7181522  | rs4776542  | 11.778 |
| ESN_7   | 15 | 59199434 | 73913426  | 14.714 | 1076 | rs8032023  | rs12050778 | 13.675 |
| ESW2_13 | 15 | 67236901 | 89898112  | 22.661 | 1736 | rs1553251  | rs4932554  | 13.054 |
| LSW_7   | 15 | 77068279 | 88461363  | 11.393 | 962  | rs8024521  | rs4436756  | 11.843 |
| ISS_6   | 15 | 79161506 | 90424349  | 11.263 | 926  | rs10519308 | rs8031518  | 12.163 |
| ESW2_12 | 16 | 37354    | 19936499  | 19.899 | 1808 | rs8466     | rs2521478  | 11.006 |
| ISN_22  | 16 | 9654131  | 23094518  | 13.440 | 990  | rs2540165  | rs7202243  | 13.576 |
| LSN_6   | 16 | 45096893 | 55296627  | 10.200 | 781  | rs9935841  | rs4538013  | 13.06  |
| HEL_12  | 16 | 51232553 | 78062240  | 26.830 | 2301 | rs6498990  | rs889474   | 11.66  |
| HEL_8   | 16 | 60799721 | 72599222  | 11.800 | 823  | rs6498842  | rs2526063  | 14.337 |
| ISN_17  | 16 | 63842529 | 80986044  | 17.144 | 1591 | rs889447   | rs1844711  | 10.775 |
| ESN_7   | 16 | 64414885 | 81239767  | 16.825 | 1555 | rs28098    | rs3910229  | 10.82  |
| ISS_19  | 16 | 64451567 | 75427238  | 10.976 | 709  | rs12373039 | rs8063580  | 15.48  |
| LSC_1   | 17 | 10169540 | 24238116  | 14.069 | 949  | rs1859999  | rs8081659  | 14.825 |
| ISC_15  | 17 | 12000976 | 27857275  | 15.856 | 930  | rs7212043  | rs11655031 | 17.05  |
| ISS_10  | 17 | 13619560 | 28014863  | 14.395 | 766  | rs1867231  | rs2640837  | 18.793 |
| ESW1_11 | 17 | 14542928 | 29188282  | 14.645 | 790  | rs2075442  | rs183412   | 18.538 |
| LSC_8   | 17 | 15797465 | 27930828  | 12.133 | 499  | rs2535609  | rs7225669  | 24.315 |
| ISC_1   | 17 | 19398101 | 33248878  | 13.851 | 823  | rs2453568  | rs2376366  | 16.83  |
| LSN_9   | 17 | 20125093 | 30694916  | 10.570 | 643  | rs3850783  | rs1554046  | 16.438 |
| LSN_25  | 17 | 22953163 | 33147733  | 10.195 | 702  | rs4332787  | rs3110642  | 14.522 |
| ISS_11  | 17 | 29850474 | 40523800  | 10.673 | 635  | rs213137   | rs2269744  | 16.808 |
| ESN_10  | 17 | 29865220 | 50724760  | 20.860 | 1344 | rs1476773  | rs7223639  | 15.52  |
| ISC_5   | 17 | 32060753 | 44553242  | 12.492 | 713  | rs975577   | rs2898834  | 17.521 |
| ESN_17  | 17 | 46229894 | 60946245  | 14.716 | 977  | rs9807047  | rs4340364  | 15.063 |
| ESN_21  | 17 | 53271378 | 64839401  | 11.568 | 689  | rs2685487  | rs571598   | 16.79  |
| ESN_22  | 17 | 53271378 | 68621519  | 15.350 | 1096 | rs2685487  | rs11656399 | 14.006 |

|         |    |          |          |        |      |            |            |        |
|---------|----|----------|----------|--------|------|------------|------------|--------|
| ESW1_27 | 17 | 56778202 | 68262269 | 11.484 | 885  | rs1990293  | rs1110614  | 12.976 |
| HEL_1   | 18 | 20723488 | 42269641 | 21.546 | 2011 | rs4800607  | rs7232954  | 10.714 |
| ISC_17  | 18 | 22275898 | 33328480 | 11.053 | 997  | rs8098634  | rs1791488  | 11.086 |
| ESN_10  | 18 | 36246789 | 50592346 | 14.346 | 1489 | rs1433870  | rs7238224  | 9.634  |
| ISN_13  | 18 | 46622254 | 63120564 | 16.498 | 1675 | rs1036932  | rs10503114 | 9.85   |
| HEL_13  | 18 | 48231042 | 59384104 | 11.153 | 1260 | rs347546   | rs897438   | 8.852  |
| HEL_1   | 19 | 12386102 | 24194887 | 11.809 | 653  | rs889175   | rs2160749  | 18.084 |
| ISN_24  | 19 | 13926488 | 24194887 | 10.268 | 545  | rs1056143  | rs2160749  | 18.841 |
| HEL_1   | 19 | 32702956 | 59697419 | 26.994 | 1977 | rs8189785  | rs7251986  | 13.654 |
| ESS_1   | 19 | 34635060 | 51936370 | 17.301 | 1162 | rs4805409  | rs10401422 | 14.889 |
| ESN_19  | 20 | 11799    | 10295418 | 10.284 | 1293 | rs1418258  | rs2327290  | 7.953  |
| HEL_1   | 20 | 7542246  | 26145931 | 18.604 | 1875 | rs6117883  | rs845787   | 9.922  |
| ISS_27  | 20 | 8942281  | 19209623 | 10.267 | 1196 | rs2206264  | rs1569767  | 8.585  |
| ISC_16  | 20 | 15642503 | 26145931 | 10.503 | 906  | rs6079936  | rs845787   | 11.593 |
| ISC_16  | 20 | 29297270 | 41830910 | 12.534 | 874  | rs6059724  | rs3091450  | 14.341 |
| ISS_2   | 20 | 30549518 | 43154907 | 12.605 | 925  | rs293554   | rs6124684  | 13.627 |
| ISS_13  | 20 | 43384230 | 62376958 | 18.993 | 1982 | rs11696248 | rs10485816 | 9.583  |
| HEL_12  | 21 | 19329569 | 46909175 | 27.580 | 3435 | rs2825303  | rs15047    | 8.029  |
| ESW1_21 | 21 | 33562658 | 45634312 | 12.072 | 1654 | rs2834167  | rs4819090  | 7.298  |
| ISS_28  | 22 | 24742510 | 35654749 | 10.912 | 1426 | rs761670   | rs738149   | 7.652  |
| ESW1_29 | 22 | 29382669 | 45241579 | 15.859 | 1863 | rs8630     | rs4823556  | 8.513  |
| HEL_14  | 22 | 31173436 | 43209504 | 12.036 | 1415 | rs4821063  | rs8136745  | 8.506  |
| ISC_8   | 22 | 35567720 | 46740955 | 11.173 | 1288 | rs131838   | rs5768286  | 8.675  |

HEL – Helsinki, ESS – Early Settlement South, ESW1 – Early Settlement West 1 (South Oulu), ESW2 – Early Settlement West 2 (North Oulu), ESN – Early Settlement North (West Lapland), LSW – Late Settlement West (South Ostrobothnia), LSC – Late Settlement Central (Central Finland), LSN – Late Settlement North (Central Lapland), ISS – Isolate South (South Kainuu), ISC – Isolate Central (North Kainuu), ISN – Isolate North (East Lapland), SNP density – average SNP density in the region (SNPs per kb).

**Table S6. Extent of homozygosity in subpopulations.**

| Population | Genome homozygosity ( %) |        |      |      |
|------------|--------------------------|--------|------|------|
|            | Mean                     | Median | Min  | Max  |
| SWE        | 0.59                     | 0.45   | 0.08 | 6.09 |
| HEL        | 1.17                     | 0.92   | 0.25 | 7.08 |
| ESS        | 0.89                     | 0.82   | 0.21 | 3.12 |
| ESW1       | 1.10                     | 1.00   | 0.27 | 3.22 |
| ESW2       | 1.18                     | 1.14   | 0.34 | 3.36 |
| ESN        | 1.23                     | 1.05   | 0.31 | 5.51 |
| LSW        | 1.16                     | 1.05   | 0.43 | 2.82 |
| LSC        | 1.37                     | 1.30   | 0.49 | 2.95 |
| LSN        | 1.34                     | 1.21   | 0.19 | 4.48 |
| ISS        | 1.82                     | 1.63   | 0.61 | 6.38 |
| ISC        | 2.03                     | 1.85   | 0.41 | 5.96 |
| ISN        | 1.59                     | 1.33   | 0.52 | 3.94 |

Including only regions of homozygosity exceeding 1 Mb.

HEL – Helsinki, ESS – Early Settlement South, ESW1 – Early Settlement West 1 (South Oulu), ESW2 – Early Settlement West 2 (North Oulu), ESN – Early Settlement North (West Lapland), LSW – Late Settlement West (South Ostrobothnia), LSC – Late Settlement Central (Central Finland), LSN – Late Settlement North (Central Lapland), ISS – Isolate South (South Kainuu), ISC – Isolate Central (North Kainuu), ISN – Isolate North (East Lapland).
